# Supplementary material
Source: PubMed Central journal article supplement (PMC10719761)
Supplement: NIHMS1942108-supplement-Supplementary_1.pdf [file NIHMS1942108-supplement-Supplementary_1.pdf]

## Supporting Information

### Covalent inhibition by a natural product-inspired latent electrophile

David P. Byun,<sup>1</sup> Jennifer Ritchie,<sup>1</sup> Yejin Jung,<sup>1</sup> Ronald Holewinski,<sup>2</sup> Hong-Rae Kim,<sup>1</sup> Ravichandra Tagirasa,<sup>1</sup> Joseph Ivanic,<sup>3</sup> Claire M. Weekley,<sup>4</sup> Michael W. Parker,<sup>4,5</sup> Thorkell Andresson,<sup>2</sup> Euna Yoo<sup>1,\*</sup>

<sup>1</sup>Chemical Biology Laboratory, Center for Cancer Research, National Cancer Institute, National Institutes of Health, Frederick, Maryland 21702, United States

<sup>2</sup>Protein Characterization Laboratory, Frederick National Laboratory for Cancer Research, Leidos Biochemical Research, Frederick, Maryland 21702, United States

<sup>3</sup>Advanced Biomedical Computational Science, Frederick National Laboratory for Cancer Research, Leidos Biomedical Research, Frederick, Maryland 21702, United States

<sup>4</sup>Department of Biochemistry and Pharmacology, Bio21 Molecular Science and Biotechnology Institute, The University of Melbourne, Parkville, VIC 3010, Australia

<sup>5</sup>Australian Cancer Research Foundation Rational Drug Discovery Centre, St. Vincent's Institute of Medical Research, Fitzroy, VIC 3065, Australia

\*Correspondence: [euna.yoo@nih.gov](mailto:euna.yoo@nih.gov)

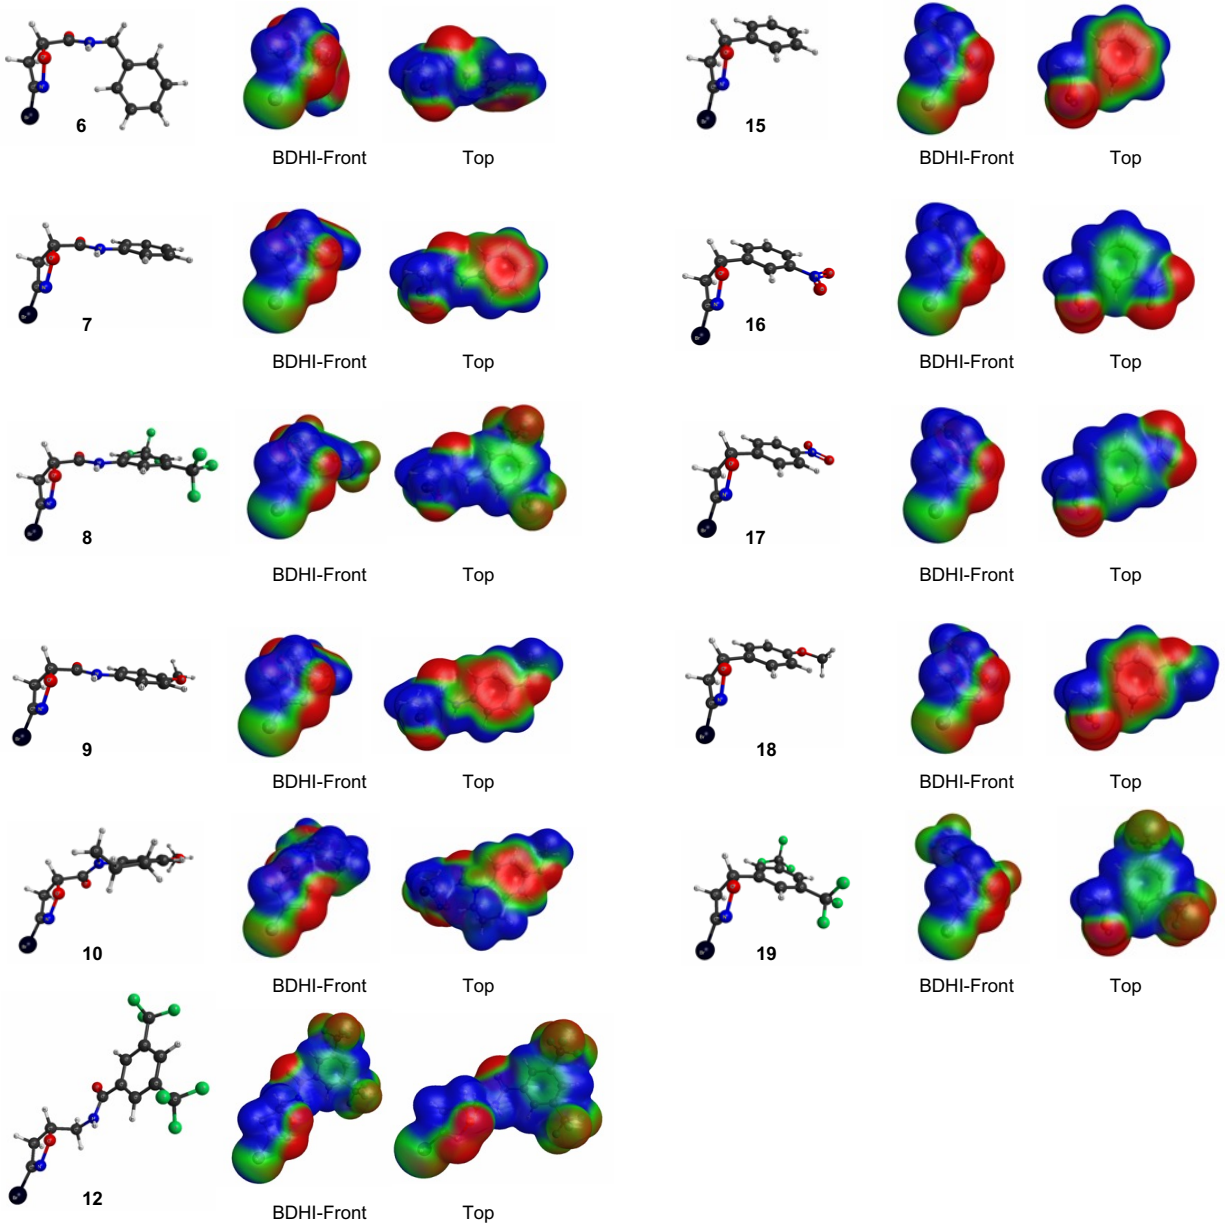

Figure S1. Molecular electrostatic potential surfaces of BDHI-containing fragments.

Table S1. Atomic charges calculated for BDHI ring

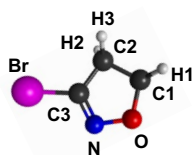

|           | C1    | H1    | C2     | H2    | H3    | C3    | Br     | N      | O      |
|-----------|-------|-------|--------|-------|-------|-------|--------|--------|--------|
| <b>6</b>  | 0.137 | 0.093 | -0.157 | 0.081 | 0.104 | 0.316 | -0.067 | -0.315 | -0.188 |
| <b>7</b>  | 0.201 | 0.061 | -0.149 | 0.081 | 0.091 | 0.323 | -0.075 | -0.305 | -0.211 |
| <b>8</b>  | 0.175 | 0.078 | -0.147 | 0.081 | 0.099 | 0.313 | -0.057 | -0.302 | -0.203 |
| <b>9</b>  | 0.176 | 0.068 | -0.137 | 0.079 | 0.090 | 0.315 | -0.074 | -0.303 | -0.205 |
| <b>10</b> | 0.388 | 0.006 | -0.410 | 0.127 | 0.130 | 0.412 | -0.080 | -0.396 | -0.122 |
| <b>12</b> | 0.329 | 0.030 | -0.231 | 0.064 | 0.125 | 0.271 | -0.063 | -0.282 | -0.216 |
| <b>15</b> | 0.394 | 0.019 | -0.132 | 0.059 | 0.071 | 0.280 | -0.082 | -0.285 | -0.241 |
| <b>16</b> | 0.368 | 0.033 | -0.192 | 0.075 | 0.095 | 0.290 | -0.066 | -0.278 | -0.226 |
| <b>17</b> | 0.406 | 0.029 | -0.191 | 0.075 | 0.094 | 0.290 | -0.063 | -0.286 | -0.237 |
| <b>18</b> | 0.456 | 0.008 | -0.193 | 0.073 | 0.082 | 0.310 | -0.086 | -0.300 | -0.242 |
| <b>19</b> | 0.358 | 0.038 | -0.186 | 0.075 | 0.098 | 0.275 | -0.058 | -0.273 | -0.224 |

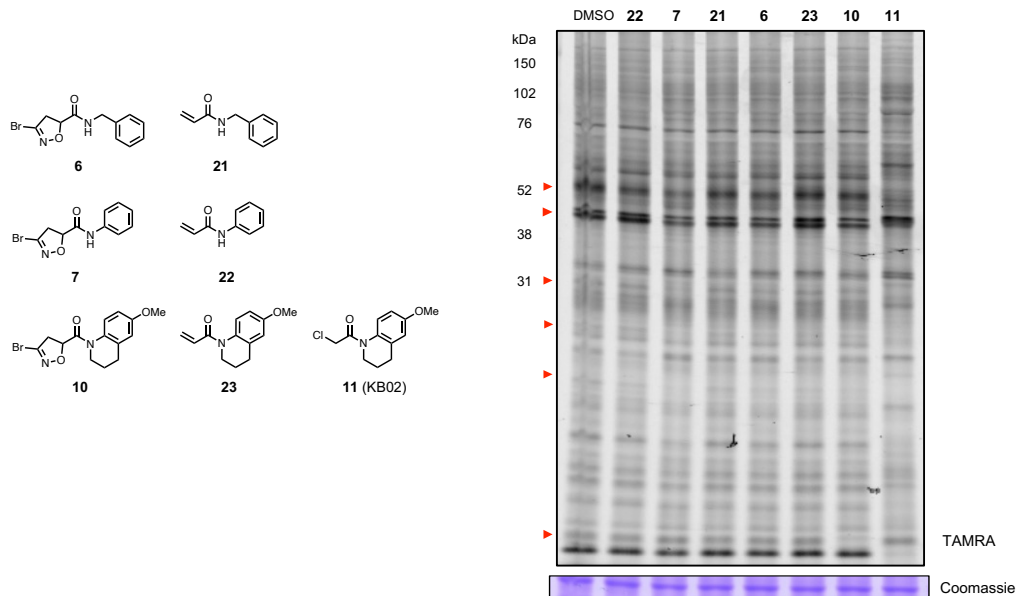

Figure S2. In-gel fluorescence image depicting competitive blockade of IA-TAMRA (1  $\mu$ M, 1 h) labeling of proteins in Jurkat cell lysates by DMSO, KB02, acrylamide- or BDHI-containing fragments (500  $\mu$ M, 4 h). Red arrows highlight protein bands that showed diminished IA-TAMRA labeling.

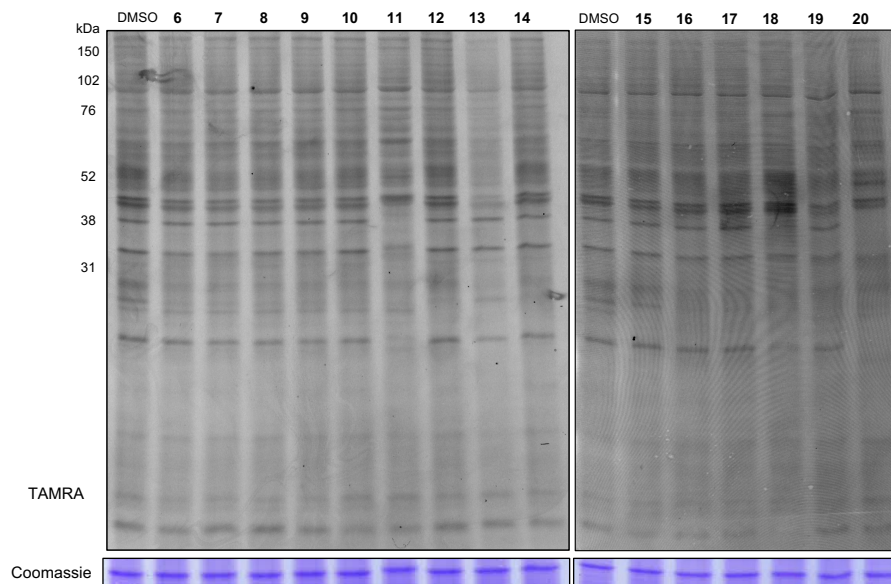

Figure S3. BDHI electrophile-containing fragments competitively block the BDHI probe labeling of proteins. Soluble proteome from Jurkat cells was treated with the indicated fragments (500  $\mu$ M, 4 h), followed by labelling with BDHI-TAMRA **2** (100  $\mu$ M, 2 h) and analyzed by SDS-PAGE and in-gel fluorescence scanning.

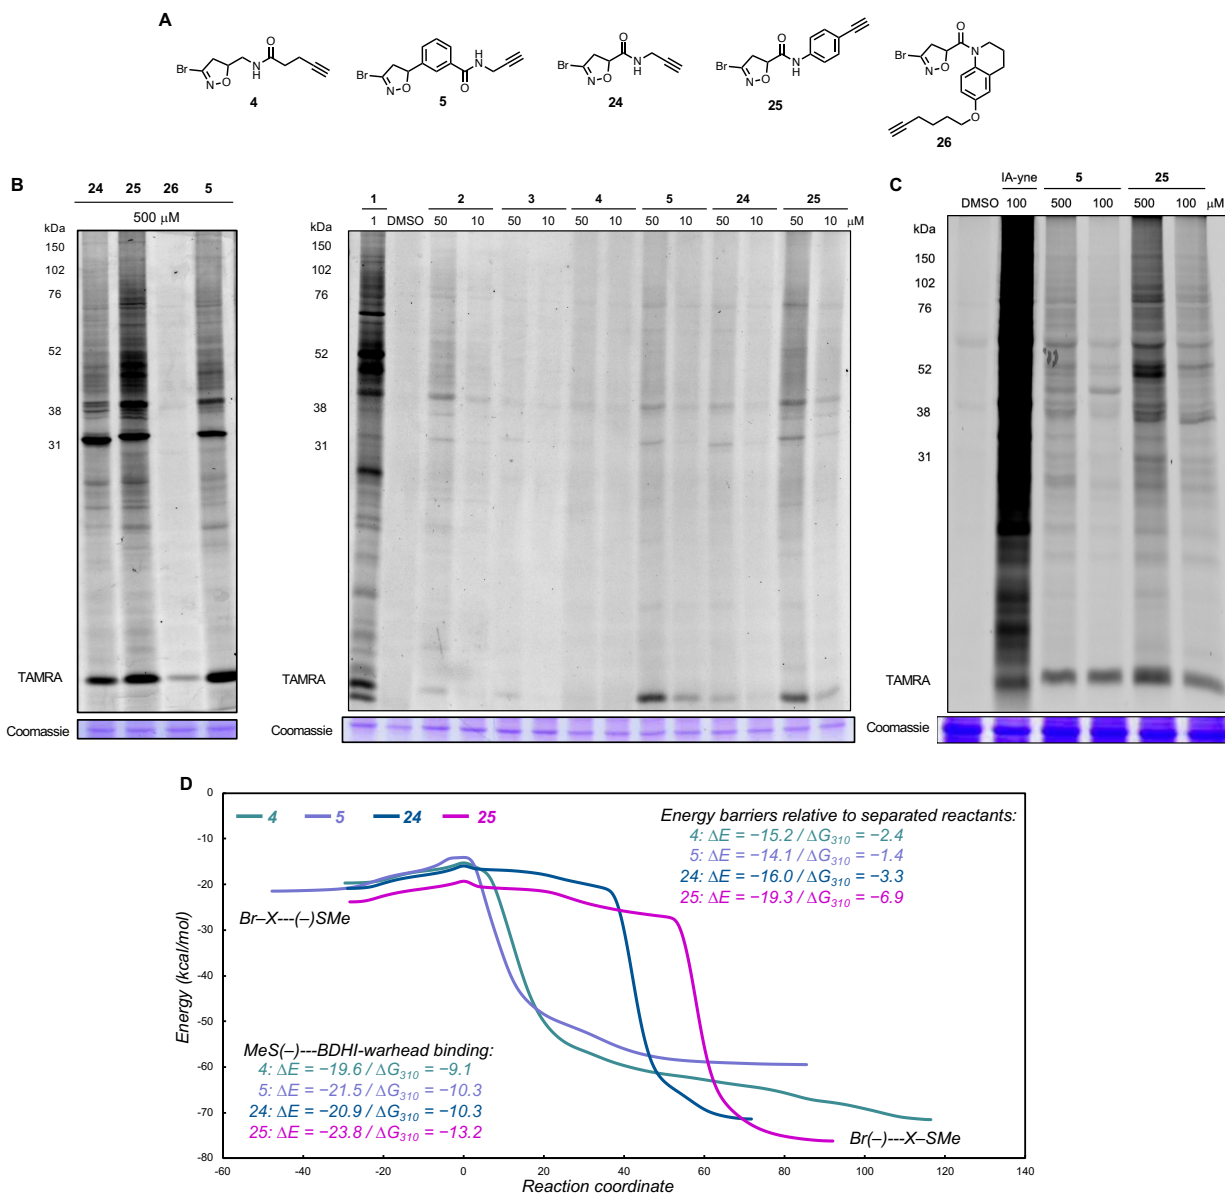

Figure S4. BDHI-alkyne probes. (A) Structures of BDHI-alkyne probes. (B) In-gel fluorescence image depicting protein bands labeled with BDHI-alkyne probes in the human proteome. Soluble proteome from Jurkat cells was treated with the indicated probes for 2 h and subsequently subjected to CuAAC with TAMRA-N<sub>3</sub>, followed by SDS-PAGE and in-gel fluorescence scanning. (C) In situ reactivity profile for BDHI alkyne probes **5** and **25**. Jurkat cells were treated for 2 h with either DMSO, IA-yne, **5** or **25**, then lysed, reacted with TAMRA-N<sub>3</sub> using CuAAC, and imaged via in-gel fluorescence. (D) Comparison of computed reaction energy profile of BDHI-alkyne probes with MeS<sup>-</sup> nucleophile using DFT calculations.

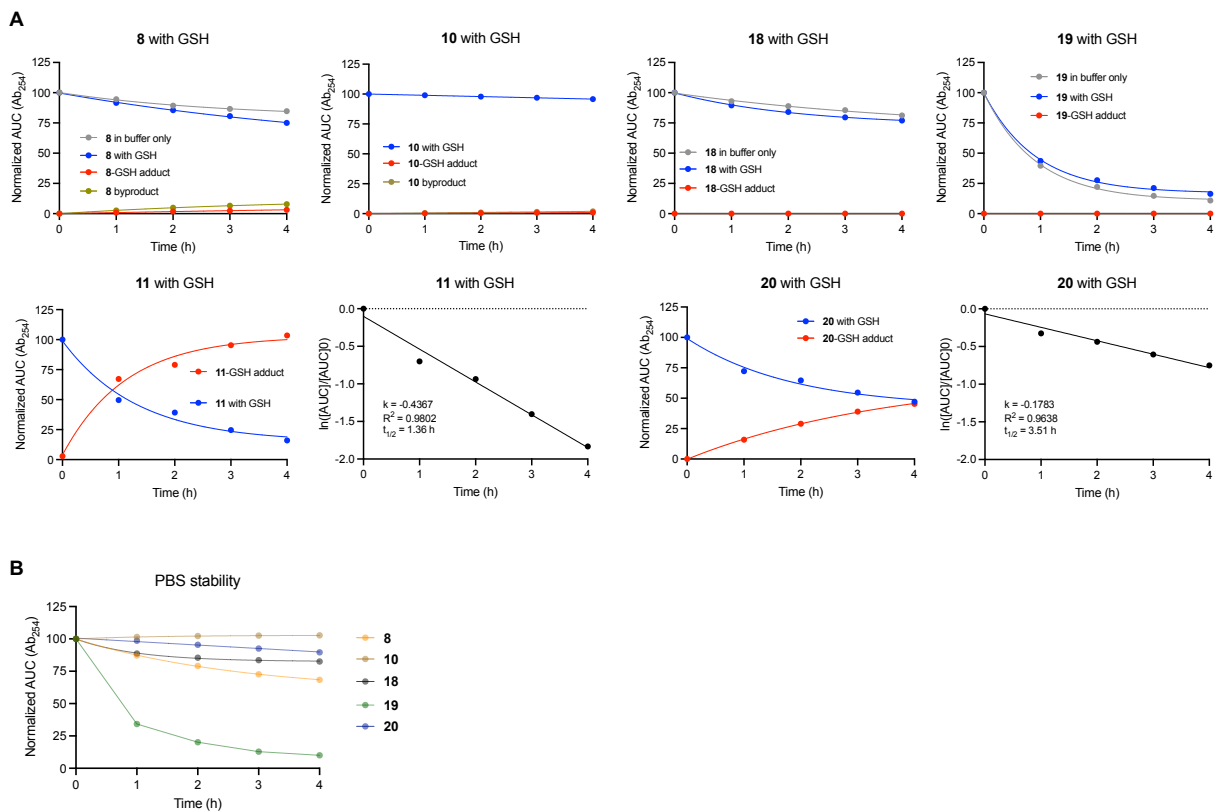

Figure S5. Solution reactivity and stability of BDHI analogs. (A) Relative compound consumption (blue) and product formation (red) measured in reactions with GSH at pH 7.4 by LC-MS. (B) Relative stability of compounds measured in PBS.

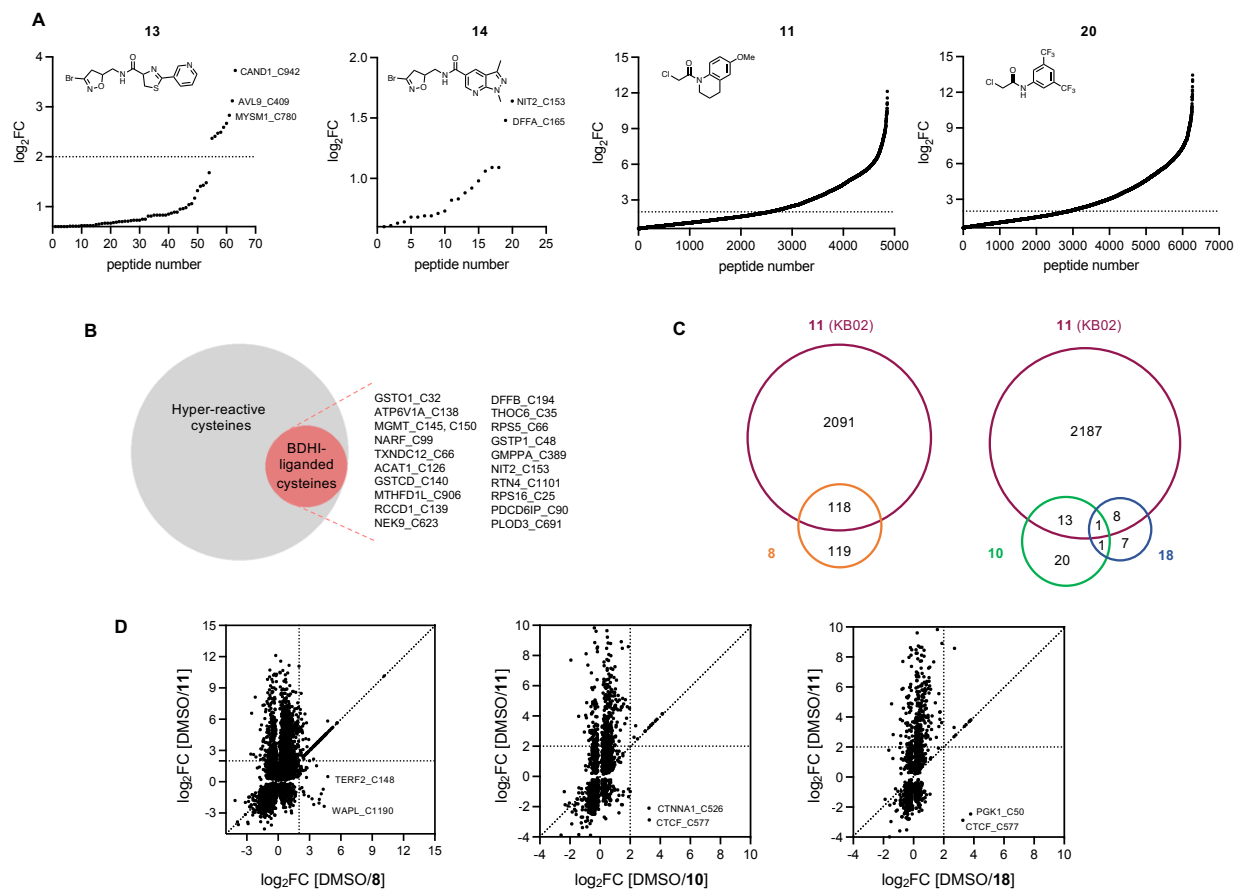

Figure S6. Competitive MS-based reactivity profiling defines cysteines liganded by BDHI analogs. (A) Structures and competition ratios ( $\log_2FC$  values) from Jurkat cell proteome treated with BDHI **13** and **14**, and CA **11** and **20**. (B) Venn diagram representation of number of hyper-reactive cysteines and BDHI-liganded cysteines. (C) Venn diagram representation of number of cysteine sites significantly liganded ( $\log_2FC > 2$ ) by BDHIs in comparison to KB02 (**11**). Results were obtained by comparing the site overlap at a given competition ratio threshold for each ligand. (D) Scatter plot of competition ratios for quantified cysteine-containing peptides ( $p$  value  $< 0.05$ ) targeted by KB02 (**11**) and each BDHI ligand **8**, **10**, and **18**.

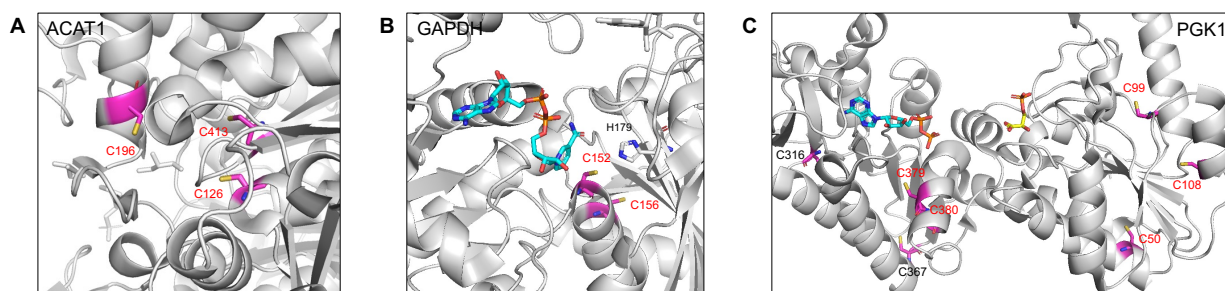

Figure S7. (A) Crystal structure of ACAT1 highlighting the active-site cysteine residues (PDB: 2IB8). (B) Crystal structure of GAPDH with NAD<sup>+</sup> bound (PDB: 1U8F). (C) Crystal structure of PGK1 depicting reactive cysteines (PDB: 2XE7).

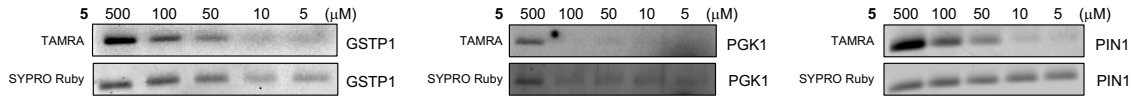

Figure S8. Concentration-dependent labeling of recombinant GSTP1, PGK1, and PIN1 by BDHI probe 5.

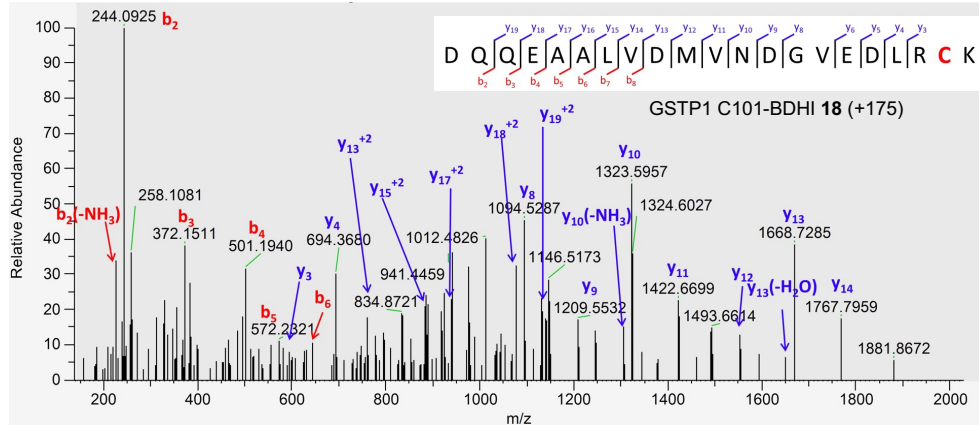

Figure S9. Annotated MS2 fragmentation spectra analysis of GSTP1 liganded with BDHI **18** at Cys101, highlighted in red.

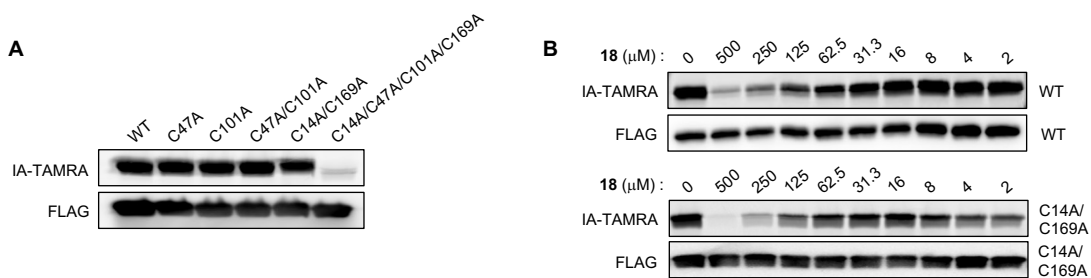

Figure S10. (A) In-gel fluorescence image of IA-TAMRA labeling (1  $\mu$ M, 1 h) of FLAG-immunoprecipitated material from HEK293T cells transfected with GSTP1-FLAG. (B) Competitive and concentration-dependent inhibition of IA-TAMRA labeling of GSTP1 (WT or C14A/C169A mutant) by compound **18** pre-treatment.



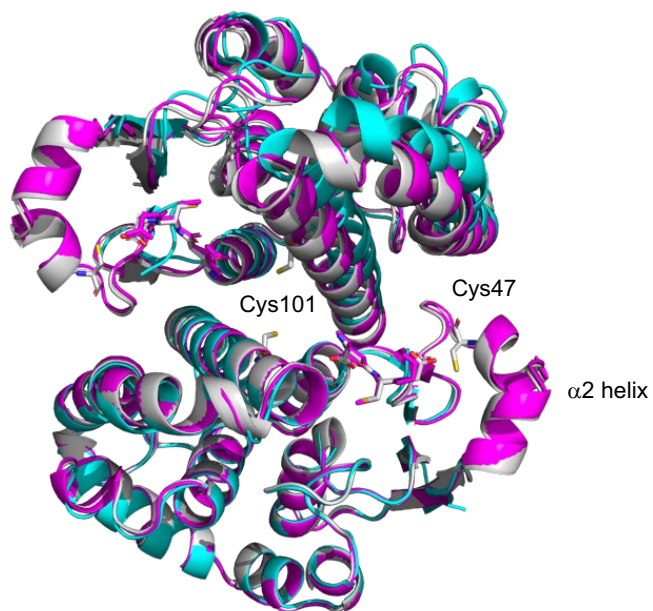

Figure S11. Structures of GSTP1. Cyan: after soaking with 5 mM **18** for 2 h at pH 7; Pink: after soaking with 5 mM **18** for 2 h at pH 7 and back-soaking with 10 mM GSH; Grey: crystallized with GSH (PDB: 5GSS). The GSH molecules and residues Cys47 and Cys101 are in stick representation.

Table S3. Summary of observations from structures of soaked crystals

| Fragment  | Soaking Concentration | Time    | Soak 2           | Crystal ID                                                                  | Electron density in $\alpha 2$ helix (monomer A)              | Electron density in $\alpha 2$ helix (monomer B)                 |
|-----------|-----------------------|---------|------------------|-----------------------------------------------------------------------------|---------------------------------------------------------------|------------------------------------------------------------------|
| DMSO      | 5%                    | 2 h     | –                | ASP0095_07_0200<br>ASP0095_08_0202                                          | no loss                                                       | no loss                                                          |
| <b>18</b> | 1 mM                  | 2 h     | –                | ASP0095_04_0194<br>ASP0095_05_0196                                          | no loss                                                       | no loss                                                          |
| <b>18</b> | 5 mM                  | 2 h     | –                | ASP0220_03_0102<br>ASP0095_01_0188*<br>ASP0095_02_0190*<br>ASP0095_03_0192* | complete loss<br>significant loss<br>no loss<br>complete loss | complete loss<br>significant loss<br>minor loss<br>complete loss |
| <b>18</b> | 0.5 mM                | 74h     | –                | ASP0220_15_0219<br>ASP0220_16_0221                                          | minor loss                                                    | significant loss                                                 |
| <b>18</b> | 2.5 mM                | 3 weeks | –                | ASP0223_05_0063                                                             | complete loss                                                 | complete loss                                                    |
| DMSO      | 5%                    | 2 h     | 10 mM<br>GSH 1 h | ASP0220_11_0204                                                             | no loss; GSH<br>bound                                         | no loss; GSH<br>bound                                            |
| <b>18</b> | 1 mM                  | 2 h     | 10 mM<br>GSH 1 h | ASP0220_12_0206                                                             | no loss; GSH<br>bound                                         | no loss; GSH<br>bound                                            |
| <b>18</b> | 5 mM                  | 2 h     | 10 mM<br>GSH 1 h | ASP0220_13_0208*                                                            | no loss; GSH<br>bound                                         | no loss; GSH<br>bound                                            |
| DMSO      | 5%                    | 2 h     | 10 mM<br>GSH 2 h | ASP0223_01_0209<br>ASP0223_02_0214                                          | no loss; GSH<br>bound                                         | no loss; GSH<br>bound                                            |
| <b>18</b> | 1 mM                  | 2 h     | 10 mM<br>GSH 2 h | ASP0223_03_0216<br>ASP0223_04_0218<br>ASP0223_05_0220                       | no loss; GSH<br>bound                                         | no loss; GSH<br>bound                                            |
| <b>18</b> | 5 mM                  | 2 h     | 10 mM<br>GSH 2 h | ASP0223_06_0222*<br>ASP0223_08_0226                                         | no loss; GSH<br>bound                                         | no loss; GSH<br>bound                                            |

\*crystals also subjected to intact mass spectrometric analysis

Table S4. Relative abundance of GSTP1 species observed in GSTP1 crystals soaked with **18** alone or with GSH back-soak

| Crystal         | % apoGSTP1 | % GSTP1-fragment | % GSTP1-(fragment) <sub>2</sub> |
|-----------------|------------|------------------|---------------------------------|
| ASP0095_01_0188 | 30         | 29               | 30                              |
| ASP0095_02_0190 | 29         | 28               | 32                              |
| ASP0095_03_0192 | 28         | 31               | 29                              |
| ASP0220_13_0208 | 28         | 27               | 33                              |
| ASP0223_06_0222 | 21         | 29               | 37                              |

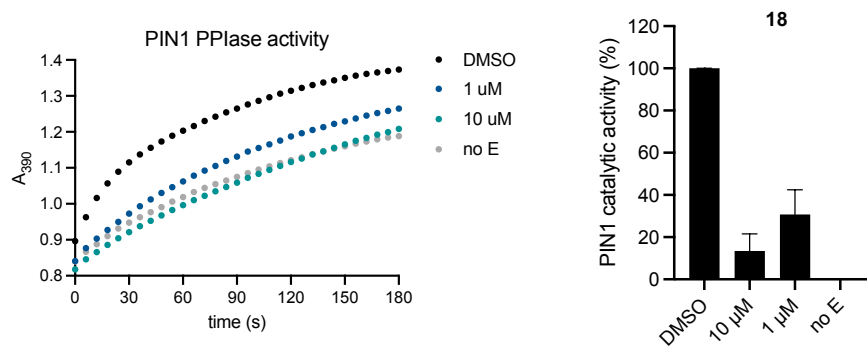

Figure S12. Chymotrypsin-coupled PIN1 PPIase assay results for compound **18** after a 14 h incubation with PIN1. Data points are plotted as the mean of  $n = 3$  independent experiments, with each experiment having  $n = 1$  independent samples.

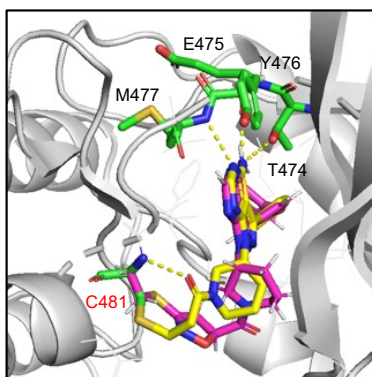

Figure S13. The predicted binding pose of **27** (magenta) is superimposed with the crystal structure of BTK covalently bound with ibrutinib (yellow, PDB: 5P9J).

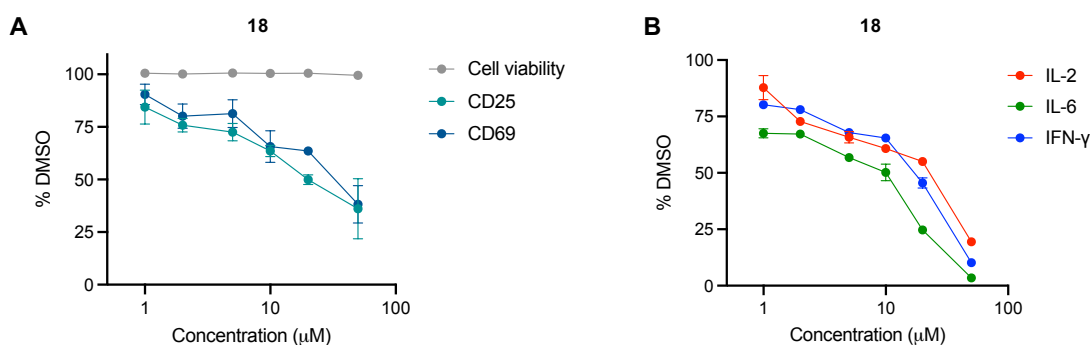

Figure S14. BDHI analog **18** suppresses T cell activation. Concentration dependent effect of BDHI **18** on T cell activation ( $n = 4$ ) measured by surface expression of CD25 and CD69 (A) and secretion of cytokines IL-2, IL-6, and IFN- $\gamma$  (B). Primary human T cells were treated with **18** under TCR-stimulating conditions (96-well plates pre-coated with  $\alpha$ CD3 and  $\alpha$ CD28) for 24 h.

## Materials and Methods

### Cell culture and isolation of proteome

All cell lines were cultured at 37°C under 5% CO<sub>2</sub> atmosphere. Jurkat and Ramos cells were cultured in RPMI supplemented with 10% fetal bovine serum (FBS), 1% penicillin/streptomycin (PS), and 2 mM L-glutamine, while HEK293T were cultured in DMEM supplemented likewise as described above. Whole blood samples from healthy adult donors were obtained from the occupational health service, National Cancer Institute (NCI), Frederick. Peripheral blood mononuclear cells (PBMCs) were isolated by Ficoll-paque (Sigma-Aldrich) density gradient centrifugation (400 g, 30 min, room temperature). The cells were pelleted (200 g, 5 min) and washed twice with PBS. Total T cells were isolated by negative selection using human T cell isolation kit (Invitrogen, 11344D) according to manufacturer's instructions. For preparation of proteomes, cells were harvested, pelleted (3000 g, 5 min, 4°C), and washed with ice-cold PBS. The cell pellets were resuspended in ice-cold PBS (37.5 µL per 1 x 10<sup>6</sup> cells), lysed by sonication using a 700-W QSonica Q700 sonicator (7 x 3 sec pulse, amplitude 1, 30 sec resting on ice between pulses), and pelleted by ultracentrifugation (15000 g, 20 min, 4°C). The supernatant was collected, filtered through a 0.45 µm syringe filter, and quantified using a Pierce BCA protein assay (Thermo Scientific, 23227). Protein concentrations were adjusted to 1.5 - 2 mg/mL and stored at -80°C.

### Solution reactivity assay with relevant nucleophiles by LC-MS

To 98 µL of 5 mM nucleophile [GSH: 1/10 dilution of freshly prepared 50 mM GSH in assay buffer (9:1 mixture of 0.1 M pH 7.4 phosphate buffer and acetonitrile); Boc-Cys-OMe: 1/100 dilution of 500 mM DMSO stock in assay buffer] was added 1 µL of compound (10 mM in DMSO, final concentration: 500 µM) and 1 µL of internal standard (10 mM rhodamine B or rhodamine 110 in DMSO, final concentration: 500 µM) (internal standard chosen such that its UV<sub>254</sub> does not overlap with tested compound). The resulting reaction mixture was analyzed by LC/MS at 0, 1, 2, 3, 4, and 16 h time points at room temperature. LC/MS runs were performed on Agilent 6250 Accurate – Mass Q-TOF LC/MS with Agilent Poroshell 5 mm 300SB-C18 column. 0.1% formic acid in water and 0.1% formic acid in acetonitrile were used as mobile phases A and B, respectively, with flow rate of 1.0 mL/min. The gradient used was 5% to 100% B from 0 to 4 min and holding at 100% B for 1 min. The analysis was done on Agilent MassHunter Qualitative Analysis B.07.00. Abundance was determined by calculating the area under the curve (AUC) of absorbance at 254 nm and normalizing to the internal standard.

### Competitive gel-based protein profiling

**Using IA-TAMRA:** Jurkat cell lysates (20 µL, 1 mg/mL in PBS) were treated with DMSO or compound (1 µL of 10 mM in DMSO, final concentration: 500 µM) at 37°C for 4 h, followed by treatment with IA-TAMRA (1 µL of 20 µM in DMSO, final concentration: 1 µM) at 37°C for 1 h. Reactions were quenched by adding 4x reducing Laemmli SDS sample buffer (6.5 µL), then samples were boiled at 100°C for 5 min, cooled to room temperature, and resolved via SDS-PAGE on a 12% polyacrylamide gel. In-gel fluorescence scanning was performed using a Typhoon FLA 9500 (GE Healthcare).

**Using click chemistry with TAMRA-N<sub>3</sub>:** Jurkat cell lysates (50 µL, 1 mg/mL in PBS) were treated with DMSO or compound (0.5 µL of 100x in DMSO) at 37°C for 4 h, followed by treatment with desired alkyne probe (0.5 µL of 100x in DMSO) at 37°C for 1 h. Labeled proteins were subjected to copper-catalyzed azide-alkyne cycloaddition (CuAAC) reaction by adding 6 µL of click mixture consisting of the following: 3 µL of 1.7 mM TBTA ligand in 4:1 *t*-BuOH/DMSO, 1 µL of 50 mM CuSO<sub>4</sub> in water, 1 µL of 50 mM TCEP-HCl in water (freshly prepared), and 1 µL of 12.5 mM TAMRA-azide in DMSO. The samples were incubated at room temperature for 1 h. Reactions were quenched by adding 4x reducing Laemmli SDS sample buffer (16.5 µL), then samples were boiled at 100°C for 5 min, cooled to room temperature, and resolved via SDS-PAGE on a 12% polyacrylamide gel. In-gel fluorescence scanning was performed using a Typhoon FLA 9500 (GE Healthcare).

### Competitive chemoproteomic profiling with IA-DTB

**Compound pre-treatment and IA-DTB labeling.** DMSO control and compound-treated samples were prepared in triplicate. Jurkat cell lysates (100 µL, 1 mg/mL in PBS) were incubated with DMSO or compound (1 µL of 50 mM in DMSO, final concentration: 500 µM) for 4 h at 37°C, followed by treatment with desthiobiotin-iodoacetamide (IA-DTB, 1 µL of 50 mM in DMSO, final concentration: 500 µM) at 25°C in the

dark with shaking for 1 h. 2.5  $\mu\text{L}$  of freshly prepared DTT (31 mg/mL in water) were added and incubated at 25°C in the dark for 30 min. Free thiols were alkylated by incubating samples with 5  $\mu\text{L}$  of 2-iodoacetamide (74 mg/mL in water) at 25°C in the dark for 30 min. Proteins were precipitated by adding 500  $\mu\text{L}$  of 4:1 MeOH/ $\text{CHCl}_3$  and 300  $\mu\text{L}$  of water, thoroughly vortexing, then centrifuging (18,000  $g$ , 2 min, 25°C) and removing the top aqueous layer without disturbing the protein disc at the layer interface. 500  $\mu\text{L}$  of MeOH were added and vortexed thoroughly, centrifuged (18,000  $g$ , 2 min, 25°C), and the supernatant was removed (2x). Samples were quickly dried using a SpeedVac, and the protein pellets were stored at -20°C until further use.

**Digestion and streptavidin enrichment.** Each sample pellet was resuspended in 200  $\mu\text{L}$  of EasyPep lysis buffer (Thermo, A45735) supplemented with Trypsin/LysC (Thermo, A40007) at a concentration of 27 ng/ $\mu\text{L}$ . Samples were incubated at 37°C with shaking for 24 h after which point 50  $\mu\text{L}$  of 10  $\mu\text{g}/\text{mL}$  TMTpro 18-plex (Thermo, A52045) reagent was added to each sample and incubated for 1 h at 25°C with shaking. Excess TMTpro was quenched with 50  $\mu\text{L}$  of 5% hydroxylamine, 20% formic acid for 10 min and samples were then combined. Samples were cleaned using EasyPep Maxi columns (Thermo, A45734) as described in the manual. Eluted peptides were dried in speed-vac. High-Capacity Streptavidin Agarose (HCSA, Thermo, 20359) was used for enrichment of DTB peptides. In a clean 1.5 mL tube, 400  $\mu\text{L}$  of HCSA slurry was added (50% slurry, 200 mg of settled beads) and centrifuged and the liquid was removed and the beads were washed three times with 400  $\mu\text{L}$  of PBS. The dried peptides were resuspended in 1 mL PBS and added to the beads and mixed with end-over-end rotation for 1 h at room temperature. The slurry was transferred to a micro spin column (Thermo, 69705) and centrifuged to remove supernatant. The beads were then washed with 500  $\mu\text{L}$  of 0.1% NP-40 in PBS, PBS and water (five times each). Bound peptides were eluted with 300  $\mu\text{L}$  of 50% ACN, 0.5% TFA (3x) and then all three elution fractions were combined and dried.

**LC/MS analysis of enriched peptides.** All samples were analyzed on a Dionex U3000 RSLC in front of a Orbitrap Eclipse (Thermo) equipped with an EasySpray ion source with FAIMS<sup>TM</sup> where indicated. Advanced Peak Determination, Monoisotopic Precursor selection (MIPS), and EASY-IC for internal calibration were enabled and dynamic exclusion was set to a count of 1 for 15 sec in all methods. Solvent A consisted of 0.1% formic acid (FA) in water and Solvent B consisted of 0.1% FA in 80% acetonitrile. Loading pump consisted of Solvent A and was operated at 7 mL/min for the first 6 min of the run then dropped to 2 mL/min when the valve was switched to bring the trap column (Acclaim<sup>TM</sup> PepMap<sup>TM</sup> 100 C18 HPLC Column, 3 mm, 75 mm I.D., 2 cm, PN 164535) in-line with the analytical column EasySpray C18 HPLC Column, 2 mm, 75 mm I.D., 25 cm, PN ES902). Enriched peptides were resuspended in 40 mL of 0.1% FA and 12  $\mu\text{L}$  was analyzed in triplicate. Each of the three injections consisted of the same LC gradient conditions and global MS parameters, with only the FAIMS compensation voltages (CVs) changing for each method. Each run used a linear LC gradient of 5-7% B for 1 min, 7-30% B for 34 min, 30-50% B for 15 min, 50-95% B for 4 min, holding at 95% B for 7 min, then re-equilibration of analytical column at 300 nL/min at 5% B for 17 min. All three MS injections employed the TopSpeed method with three FAIMS compensation voltages (CVs) and a 1 second cycle time for each CV (3 second cycle time total) that consisted of the following: Spray voltage was 2200V and ion transfer temperature was 300°C. MS1 scans were acquired in the Orbitrap with resolution of 120,000, AGC of 4e5 ions, and max injection time of 50 ms, mass range of 350-1600 m/z; MS2 scans were acquired in the Orbitrap using TurboTMT method with resolution of 15,000, AGC of 1.25e5, max injection time of 22 ms, HCD energy of 30%, isolation width of 1.6 Da, intensity threshold of 2.5e4 and charges 2-5 for MS2 selection. Advanced Peak Determination, Monoisotopic Precursor selection (MIPS), and EASY-IC for internal calibration were enabled and dynamic exclusion was set to a count of 1 for 15 sec in all methods. The only difference in the methods was the CVs used, Method 1 used CVs of -45, -60, -75; method 2 used CVs of -50, -65, -80; method 3 used CVs of -55, -70, -85.

**Database search and post-processing analysis.** All data were searched in Proteome Discoverer 2.4 using the Sequest node. Data was searched against the Uniprot Human database from Feb 2020 using a full tryptic digest, 2 max missed cleavages, minimum peptide length of 6 amino acids and maximum peptide length of 60 amino acids, an MS1 mass tolerance of 10 ppm, MS2 mass tolerance of 0.02 Da, fixed modifications for TMTpro (+304.207) on lysine and peptide *N*-terminus, variable oxidation on methionine (+15.995 Da), and variable carbamidomethyl (+57.021) and desthiobiotin iodoacetamide (+296.185) on cysteine. Percolator was used for FDR analysis and IMP-ptmRS for site localization. TMTpro reporter ions were quantified using the Reporter Ion Quantifier node and normalized on total peptide amount. For the final group comparisons only peptides that were observed in 6 or more total samples were included.

### **In situ proteomic labeling and in-gel fluorescence analysis**

Jurkat cells ( $1 \times 10^6$  cells/mL, RPMI media) were treated with DMSO or alkyne probe (10  $\mu$ L of 50 mM in DMSO, final concentration: 500  $\mu$ M) at 37°C for 2 h. Triplicates were combined and cells were lysed using RIPA lysis buffer (Thermo Scientific). The protein concentration was measured by using the BCA protein assay (Pierce™ BCA protein assay kit). Samples were then stored at -80°C until further use. Labeled proteins were subjected to copper-catalyzed azide-alkyne cycloaddition (CuAAC) reaction by adding 6.75  $\mu$ L of click mixture consisting of the following: 4.5  $\mu$ L of 1.7 mM TBTA ligand in 4:1 *t*-BuOH/DMSO, 0.75  $\mu$ L of 50 mM CuSO<sub>4</sub> in water, 0.75  $\mu$ L of 50 mM TCEP-HCl in water (freshly prepared), and 0.75  $\mu$ L of 12.5 mM TAMRA-azide in DMSO. The samples were incubated at room temperature for 1 h. Reactions were quenched by adding 4x reducing Laemmli SDS sample buffer (12.4  $\mu$ L), then samples were boiled at 100°C for 5 min, cooled to room temperature, and resolved via SDS-PAGE on a 12% polyacrylamide gel. In-gel fluorescence scanning was performed using a Typhoon FLA 9500 (GE Healthcare).

For BTK probes, Ramos cells ( $3 \times 10^6$  cells) were plated on 6 well plate in complete RPMI-1640 (Quality Biological) and treated with DMSO (0.02% (v/v)) or alkyne probes (1  $\mu$ M) for 24 h at 37°C under 5% CO<sub>2</sub>. The cells were harvested, washed twice with ice cold PBS, and lysed using RIPA buffer containing protease inhibitor cocktail (cOmplete™ Protease Inhibitor Cocktail, Roche). The lysates were centrifuged at 15,000 rpm for 20 min at 4°C, and the protein concentration was determined by the BCA protein assay.

### **IA-TAMRA labeling of recombinant proteins**

Recombinant protein (diluted in 20  $\mu$ L of PBS) was treated with DMSO or compound (1  $\mu$ L of 10 mM in DMSO, final concentration: 500  $\mu$ M) and incubated at 37°C for 4 h, followed by treatment with IA-TAMRA (1  $\mu$ L of 20  $\mu$ M in DMSO, final concentration: 1  $\mu$ M) for 1 h. Reactions were quenched by adding 4x reducing Laemmli SDS sample buffer (6.5  $\mu$ L), then samples were boiled at 100°C for 5 min, cooled to room temperature, and resolved via SDS-PAGE on a 12% polyacrylamide gel. In-gel fluorescence scanning was performed using a Typhoon FLA 9500 (GE Healthcare).

### **In vitro labeling of recombinant proteins by alkyne probes**

Recombinant protein (diluted in 20  $\mu$ L of PBS) was treated with DMSO or compound (1  $\mu$ L of 10 mM in DMSO, final concentration: 500  $\mu$ M) and incubated at 37°C for 4 h, followed by treatment with **5** (1  $\mu$ L of 10 mM in DMSO, final concentration: 500  $\mu$ M) for 2 h. Labeled proteins were subjected to copper-catalyzed azide-alkyne cycloaddition (CuAAC) reaction by adding 2.4  $\mu$ L of click mixture consisting of the following: 1.2  $\mu$ L of 1.7 mM TBTA ligand in 4:1 *t*-BuOH/DMSO, 0.4  $\mu$ L of 50 mM CuSO<sub>4</sub> in water, 0.4  $\mu$ L of 50 mM TCEP-HCl in water, and 0.4  $\mu$ L of 12.5 mM TAMRA-azide in DMSO. The samples were incubated at room temperature for 1 h. Reactions were quenched by adding 4x reducing Laemmli SDS sample buffer (6.5  $\mu$ L), then samples were boiled at 100°C for 5 min, cooled to room temperature, and resolved via SDS-PAGE on a 12% polyacrylamide gel. In-gel fluorescence scanning was performed using a Typhoon FLA 9500 (GE Healthcare).

### **Immunoprecipitation and labeling of ectopically expressed GSTP1-FLAG**

Using pcDNA3.1 expression vector encoding FLAG-tagged human GSTP1 (Genscript), each expression plasmid was transfected into HEK293T cells using Lipofectamine LTX with PLUS Reagent (Thermo Scientific). Transfected cells were incubated for 24 h at 37°C under 5% CO<sub>2</sub> before subsequent experiments. HEK293T cells were lysed using RIPA buffer (Thermo Scientific) and the cell lysates were incubated with anti-FLAG® M2 Magnetic Beads (Sigma-Aldrich) at 4°C overnight. Flag-tagged proteins were eluted with DYKDDDDK synthetic peptide (Sino Biological). 1  $\mu$ g of isolated proteins were treated with DMSO (5% (v/v)) or varying concentrations of compound **18** for 4 h, followed by 1 h incubation with 1  $\mu$ M of IA-TAMRA. The samples were analyzed by SDS-PAGE and in-gel fluorescence scanning and FLAG western blot (anti-FLAG, Cell Signaling, 7074).

### **GSTP1 enzymatic assay**

rhGSTP1 was adjusted to 2.2 ng/ $\mu$ L in assay buffer (0.1 M phosphate buffer, pH 7.0). In separate tubes, samples were prepared in duplicate by combining 19  $\mu$ L of adjusted rhGSTP1 (2.2 ng/ $\mu$ L) and 1  $\mu$ L of either DMSO or 20X compound in DMSO. A blank sample was also included by combining 19  $\mu$ L of assay buffer and 1  $\mu$ L of DMSO. Samples were incubated at room temperature for 15 min then transferred to a 96 well

plate. 20  $\mu$ L of 4 mM GSH in assay buffer (prepared from 250 mM stock in ddH<sub>2</sub>O) were added, followed by 40  $\mu$ L of 2 mM 1-bromo-2,4-dinitrobenzene (BDNB) substrate in assay buffer (prepared from 75 mM stock in ethanol). Absorbance was measured at 340 nm for 10 min in 30 sec intervals using a BioTek Cytation 5 plate reader.

### **GSTP1 crystallography**

Full-length human GSTP1 was purified from *E. coli* by affinity chromatography. The protein was stored in 6 mg/mL aliquots in 10 mM potassium phosphate pH 6.5 and 0.1 mM EDTA at -80°C.

**Crystallization.** Protein was thawed and diluted to 5 mg/mL in the absence of ligands (apoGSTP1). Crystallization drops were prepared in hanging drop plates, with 1  $\mu$ L of protein solution added to 1  $\mu$ L of crystallization buffer containing 0.1 M MES pH 6.0, 20 mM CaCl<sub>2</sub>, 26% PEG8000, at room temperature. After 1 h, drops were streak-seeded using a cat whisker dipped in drops containing apoGSTP1 crystals previously grown in crystallization buffer plus 10 mM DTT.

**Crystal soaks.** Soaking solutions were prepared containing crystallization buffer with 1 mM or 5 mM **5** or **18**. An equal volume of soaking solution was added to crystallization drops containing apoGSTP1 crystals with crystals soaked for 74 h or three weeks. Alternatively, apoGSTP1 crystals were transferred into buffer containing either 0.1 M MES pH 6 or 7, 20 mM CaCl<sub>2</sub>, 26% PEG8000 and 1 mM or 5 mM fragment. Back-soaking with GSH was also attempted. After soaking with 1 mM or 5 mM **18**, an equal volume of soaking solution containing GSH (0.1 M MES pH 6, 20 mM CaCl<sub>2</sub>, 26% PEG8000 and 20 mM GSH) was added to the drop.

**Crystal harvesting.** Crystals were transferred into cryobuffers containing 0.1 M MES pH 6, 20 mM CaCl<sub>2</sub>, 26% PEG8000  $\pm$  500  $\mu$ M **5** or **18** and 5% hexylene glycol, then 10% hexylene glycol. Crystals were flash frozen and stored in liquid nitrogen.

**Crystallography.** Data were collected at 100 K at the Australian Synchrotron's MX1<sup>1</sup> or MX2<sup>2</sup> beamline, with crystals diffracting to resolutions of 1.99-2.71 Å in the C2 space group. Data were integrated using XDS<sup>3</sup> and scaled with AIMLESS from the CCP4i2 program suite.<sup>4</sup> DIMPLe (<http://ccp4.github.io/dimple/>) was used to generate maps and a rigid body refinement was performed in REFMAC5<sup>5</sup> using PDB 5DCG<sup>6</sup> (with heteroatoms removed) or 5GSS<sup>7</sup> (with GSH and waters) as search models. An additional round of model building and refinement was performed using Coot<sup>8</sup> and REFMAC5, as needed.

**GSTP1 crystals for mass spectrometry.** GSTP1 crystals were harvested from crystal loops after X-ray diffraction experiments. The crystals had been soaked for 2 h at pH 7 in 5 mM **18** only or subsequently back-soaked with 10 mM GSH. Crystals were transferred from the soaking solution into two cryobuffer solutions where no fragment was present and frozen in liquid nitrogen. After diffraction, crystals were thawed and transferred into acetonitrile, then MilliQ water. After failing to dissolve in water, 6 M urea was added to dissolve the crystals. The 2-4  $\mu$ L drop was then diluted with 10  $\mu$ L of MilliQ water for analysis. Dissolved protein crystals were analysed for total protein mass by electrospray ionisation mass spectrometry on a Acquity UHPLC H-Class/Waters Vion IMS-QTOF system (Melbourne Mass Spectrometry and Proteomics Facility, Bio21 Institute, University of Melbourne). Data were analysed using MassLynx software.

### **PIN1 PPlase activity assay**

Inhibition of PIN1 isomerase activity was determined using the chymotrypsin-coupled PPlase assay with His-PIN1 and Suc-Ala-Glu-Pro-Phe-pNA peptide substrate. Briefly, 100 nM of His-PIN1 was preincubated with the indicated concentrations of compound for 14 h at 4 °C in buffer containing 35 mM HEPES pH 7.8, and 0.1 mg/mL BSA. Immediately before the assay was started, the peptide substrate (Suc-Ala-Glu-Pro-Phe-pNA peptide substrate, final concentration: 200  $\mu$ M) was added followed by the addition of chymotrypsin (final concentration: 1 mg/mL). After mixing the resulting solution, PPlase activity was measured by monitoring proteolytic release of *p*-nitroaniline at 390 nm for 3 min (absorbance was measured for 3 min in 5 sec intervals using a BioTek Cytation 5 plate reader).

### **In vitro kinase activity (homogeneous time resolved fluorescence assay, carried out by Nanosyn, Santa Clara, CA, USA)**

Kinase reactions are assembled in 384-well plates in a total volume of 10  $\mu$ L. Test compounds were diluted in DMSO and plated at 100x of the screening concentrations, while the final concentration of DMSO in all assays was kept at 1%. 0.5 nM concentration of BTK, 0.2 nM BLK in 100 mM HEPES, pH 7.5; 0.1% BSA,

0.01% Triton X-100, 1 mM DTT, 5 mM MgCl<sub>2</sub>, 10 μM sodium orthovanadate were, 10 μM β-glycerophosphate were used. The compounds were pre-incubated for 15 min. The reaction was initiated by adding substrate (0.05 μM) with ATP (20 μM for BTK, 10 μM for BLK) in the kinase buffer. The reaction mixture was incubated at 25°C for 3h for BTK and 2h for BLK. After incubation, the reaction was terminated by addition of EDTA along with antibodies HTRF reagents and the assay plate was read on Biotek Synergy Neo2 plate reader.

### **BTK and BLK autophosphorylation activity in cells**

Ramos cells were treated with DMSO (0.02% (v/v)) or 1 μM of compound for 4 h at 37°C. The cells were then stimulated with 10 μg/mL anti-human IgM (Jackson ImmunoResearch, 109-006-129) for 10 min. For washout conditions, cells were washed with fresh complete media, suspended in fresh complete media for 2 h, and stimulated with 10 μg/mL anti-human IgM for 10 min. After centrifugation, cell pellets were lysed using RIPA buffer (Thermo Scientific) and protein concentration was determined using the BCA protein assay. Equal amounts of samples were resolved via SDS-PAGE and transferred onto a nitrocellulose membrane (Bio-Rad). The membrane was blocked with 2% (w/v) BSA for 1 h, washed with TBST (containing 0.1% (v/v) Tween 20), and then incubated with the following primary antibodies overnight at 4°C: anti-BTK (Cell Signaling, 8547), anti-phospho-BTK (Cell Signaling, 87141), anti-BLK (Cell Signaling, 66002), and anti-phospho-BLK (Invitrogen, PA5-64566). After additional washing with TBST, membranes were probed with a horseradish peroxidase-conjugated secondary antibody (Cell Signaling, 7074) at room temperature, followed by ECL detection (SignalFire ECL Reagent, Cell Signaling). The protein bands were observed using ImageQuant 800 imaging system (Cytiva).

### **Ibrut-yne and 27-yne labeling of recombinant BTK**

Recombinant protein (diluted in 20 μL of PBS) was treated with DMSO or compound (10 μM) and incubated at 37°C for 4 h, then samples were treated with the alkyne probe (1 μM) and incubated at 37°C for 4 h. Samples were then subjected to copper-catalyzed azide-alkyne cycloaddition (CuAAC) reaction by adding 2.4 μL of click mixture consisting of the following: 1.2 μL of 1.7 mM TBTA ligand in 4:1 *t*-BuOH/DMSO, 0.4 μL of 50 mM CuSO<sub>4</sub> in water, 0.4 μL of 50 mM TCEP-HCl in water (freshly prepared), and 0.4 μL of 12.5 mM TAMRA-azide in DMSO. The samples were incubated at room temperature for 1 h. Reactions were quenched by adding 4x reducing Laemmli SDS sample buffer (6.5 μL), then samples were boiled at 100°C for 5 min, cooled to room temperature, and resolved via SDS-PAGE on a 10% polyacrylamide gel. In-gel fluorescence scanning was performed using a Typhoon FLA 9500 (GE Healthcare).

### **Modification site analysis of BDHI 18**

1 μg of recombinant protein was diluted in 40 μL of PBS, then BDHI 18 (1 μL of 10 mM in DMSO) were added and incubated at 37°C for 4 h in triplicate, then samples were flash frozen and stored at -80°C until further use.

**Digestion of GSTP1 and PIN1.** Each replicate was treated with 100 μL of EasyPep Lysis buffer, 50 μL of reducing solution and 50 μL of alkylating solution provided with the EasyPep kit (Thermo, A45733). Samples were incubated at 25°C for 1 h in the dark then treated with 10 μL of 100 ng/μL of trypsin/LysC (Thermo, A40009) and incubated at 37°C overnight ~18 h. Each sample was treated with 50 μL of stop solution provided with the EasyPep kit and cleaned using EasyPep 96-well plate, eluted in 300 μL and dried in speedvac.

**LC/MS analysis.** All samples were analyzed on a Dionex U3000 RSLC in front of a Orbitrap Eclipse (Thermo) equipped with an EasySpray ion source with FAIMS<sup>TM</sup> interface. Advanced Peak Determination, Monoisotopic Precursor selection (MIPS), and EASY-IC for internal calibration were enabled and dynamic exclusion was set to a count of 1 for 15 sec in all methods. Solvent A consisted of 0.1% FA in water and Solvent B consisted of 0.1% FA in 80% ACN. Loading pump consisted of Solvent A and was operated at 7 μL/min for the first 6 minutes of the run then dropped to 2 μL/min when the valve was switched to bring the trap column (Acclaim<sup>TM</sup> PepMap<sup>TM</sup> 100 C18 HPLC Column, 3 μm, 75 μm I.D., 2 cm, PN 164535) in-line with the analytical column EasySpray C18 HPLC Column, 2 μm, 75 μm I.D., 25 cm, PN ES902). Digested peptides were resuspended in 50 μL of 0.1% FA and 5 μL was analyzed in triplicate at a flow rate of 300 nL/min using the same linear LC gradient of 5-7% B for 1 min, 7-30% B for 34 min, 30-50% B for 15 min, 50-95% B for 4 min, holding at 95% B for 7 min, then re-equilibration of analytical column at 5% B for 17 min. For each sample all three MS injections employed the TopSpeed method with three FAIMS



compensation voltages (CVs) and a 1 second cycle time for each CV (3 second cycle time total) that consisted of the following: Spray voltage of 2200V and ion transfer temperature of 300°C. MS1 scans were acquired in the Orbitrap with resolution of 120,000, AGC of 4e5 ions, and max injection time of 50ms, mass range of 350-1600 m/z; MS2 scans were acquired in the Orbitrap using resolution of 15,000, AGC of 5e4, max injection time of 22 ms, HCD energy of 30%, isolation width of 0.4 Da, intensity threshold of 2.5e4 and charges 2-5 for MS2 selection. The only difference in the methods was the FAIMS CVs used.

**Database search general parameters.** All data were searched in Proteome Discoverer 2.4 using the Sequest node. For each sample the three MS files acquired were searched together to generate one output for each individual sample. Data was searched against the Uniprot Human database from Feb 2020 using a full tryptic digest, 2 max missed cleavages, peptide length of 6-40 amino acids, an MS1 mass tolerance of 10 ppm, MS2 mass tolerance of 0.02 Da, oxidation on methionine (+15.995 Da) and carbamidomethyl on cysteine (+57.021) were set to variable modifications on all searches. Additional variable modifications on cysteine of BDHI **18** (+175.063). FDR was calculated using Fixed Value PSM and modification sites were localized with the IMP-ptmRS node.

### **Cell Titer Blue cell viability assay**

Cells were cultured as described above, and all incubation steps were performed at 37°C under 5% CO<sub>2</sub> atmosphere. 100 µL of cells were seeded into 96-well plates (Jurkat: 50,000 cells/well; HeLa/HEK293T: 10,000 cells/well; HeLa and HEK293T cells were left to adhere overnight while Jurkat cells were immediately treated with compounds). A blank was included using 100 µL of media containing no cells. Cells were treated with either DMSO or compounds (1 µL of 100x compound in DMSO). Following 24 h incubation, 20 µL of CellTiterBlue (Promega, G8081) were added and incubated for 2 h. Viability was quantified by fluorescence (Ex. 560 nm/Em. 590 nm) using a BioTek Cytation 5 plate reader. Fluorescence values were normalized to DMSO (100% viability) and blank wells (0% viability). Experiments were performed in biological duplicate.

### **T cell activation screen**

Tissue culture treated 96-well plates were coated with αCD3 (5 µg/mL) and αCD28 (2 µg/mL) antibodies from BioXcell in DPBS (200 µL/well) and left at 4°C overnight. Next day, the pre-coated plates were washed with complete media (3 x 200 µL). Freshly isolated total T cells were re-suspended in complete IMDM media supplemented with 10% FBS, penicillin (100 U/mL), and streptomycin (100 µg/mL) at 2 x 10<sup>6</sup> cells/mL. T cells were added to each well (200 µL/well, 4 x 10<sup>5</sup> cells/well), followed by the addition of 0.8 µL of 250x compound in DMSO to the respective wells. Cells were then incubated with the compound at 37°C in a 5% CO<sub>2</sub> containing incubator for 24 h. Following the treatment, the cells were collected for subsequent analysis. The supernatants were kept and stored at -20°C for the analysis of secreted cytokines.

### **Flow cytometry analysis**

Following the PBS washes, the cells were stained with fixable near-IR LIVE/DEAD cell stain (Invitrogen, L34975) according to manufacturer's instructions. Briefly, LIVE/DEAD dye was diluted with PBS (1:1000) and added to each tube (200 µL) and the cells were incubated for 30 min at room temperature in the dark. The cells were then pelleted (500 g, 5 min), and washed with PBS (2 x 200 µL). The cells were incubated with mixture of antibodies for the appropriate cell surface markers (αCD25-Alexa Fluor 700 and αCD69-Alexa Fluor 647 antibodies, Biolegend) diluted in PBS containing 2% FBS. After 1 h incubation with antibodies on ice, cells were washed once with PBS, resuspended in PBS (200 µL), and analyzed by flow cytometry (BD Symphony).

### **Bio-Plex quantification of secreted cytokines**

The supernatants collected from T cell activation assays in the presence or absence of compounds were used for the analysis of secreted cytokines using Bio-Plex Pro Human Cytokine assay (Bio-Rad) according to manufacturer's instructions. 50 µL of supernatant was used to detect different cytokines secreted during T cell activation and analyzed by Bioplex 200 system.

### **In silico modeling**

All *in silico* studies were conducted on ICM-Pro version 3.9 (Molsoft LLC, San Diego, CA). PDB structures were converted to internal coordinates by software's built-in function with water removal, hydrogen

optimization and HisProAnsGlnCys optimization. Binding sites were determined by ICM pocket finder function, and target residue for covalent docking was selected based on either the proteomics LC/MS-MS data obtained in this study or based on reported literature. Reaction type was restricted to SNAR-type, where the bromine of the dihydroisoxazole moiety is replaced to a cysteine. PIN1 (PDB: 7EKV) and BTK (PDB: 5P9J) docking were performed with a thoroughness of 500 and N conformation of 500. All docking was conducted in triplicate. Best scoring pose was selected for visual inspection and analysis.

### Computational Chemistry

Quantum chemistry calculations were performed the GAMESS package<sup>9-10</sup> where 6-31G(d) basis sets (spherical harmonics) were used.<sup>11-13</sup> Density functional theory (DFT)<sup>14</sup> utilizing the M11<sup>15</sup> functional was used to optimize geometries and subsequent Hessians were computed seminumerically (double differences) using analytic gradients. Minimum energy paths connecting transition states and corresponding reactant/product minima were determined using the second-order intrinsic reaction coordinate (IRC) method of Gonzalez and Schlegel.<sup>16</sup> Atomic charges were computed by fitting to the electrostatic potentials via a geodesic point selection scheme.<sup>17</sup> Molecular electrostatic potential (MEP) surfaces were illustrated using MacMolPlt.<sup>18</sup>

### General chemical materials and methods

All solvents were purchased from Fisher Scientific and Sigma Aldrich (HPLC grade). All reagents were purchased from Sigma Aldrich and Oakwood Chemicals. All water-sensitive reactions were performed in anhydrous solvents under positive pressure of nitrogen. Reactions were analyzed by LC-MS (Agilent). Reverse-phase HPLC was conducted with an Agilent 1260 infinity II using C18 columns (5  $\mu$ m, 100  $\text{\AA}$ , 250 x 10 mm) (solvent A: water with 0.1% (v/v) TFA, solvent B: CH<sub>3</sub>CN with 0.1% (v/v) TFA). NMR spectra were recorded on a Varian 400 MHz (400/100) or Varian 500 MHz (500/125) equipped with a pulsed field gradient accessory. Chemical shifts are given in ppm ( $\delta$ ) relative to tetramethylsilane as an internal standard. Coupling constants are given in Hz.

### Synthetic procedures

Scheme S1. Synthesis of BDHI analogs

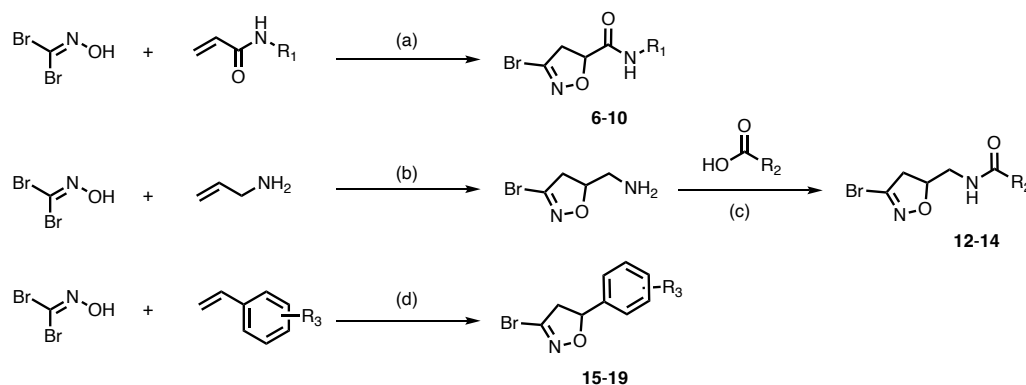

**Reagents and Conditions:** (a) aq.KHCO<sub>3</sub>, DMF, rt, 1 h; (b) KHCO<sub>3</sub>, H<sub>2</sub>O, rt, 4 h; (c) EDC, DMAP, DMF, rt, 16 h; (d) K<sub>2</sub>CO<sub>3</sub>, EtOAc, rt, 16h.

### General procedure for synthesis of compounds **6-10** and **24-29**

To a solution of acrylamide (0.15 mmol), dibromoformaldoxime (26 mg, 0.13 mmol) in DMF was added aq. KHCO<sub>3</sub> (33 mg, 0.33 mmol). The reaction mixture was stirred at room temperature for 1 h, diluted with H<sub>2</sub>O and extracted with EtOAc. The crude product was purified by HPLC to give the final product.

*N*-benzyl-3-bromo-4,5-dihydroisoxazole-5-carboxamide (**6**). (28.9 mg, 78%). <sup>1</sup>H NMR (500 MHz, CDCl<sub>3</sub>)  $\delta$  7.38 – 7.24 (m, 5H), 6.98 (s, 1H), 5.08 (dd, *J* = 11.0, 6.4 Hz, 1H), 4.55 (dd, *J* = 14.7, 6.3 Hz, 1H), 4.38 (dd,

$J = 14.7, 5.4$  Hz, 1H), 3.65 – 3.51 (m, 2H). HRMS (ESI):  $m/z$   $[M + H]^+$  calcd. for  $C_{11}H_{12}BrN_2O_2^+$ : 283.0077, found: 283.00844.

3-bromo-*N*-phenyl-4,5-dihydroisoxazole-5-carboxamide (**7**). (28.6 mg, 82%).  $^1H$  NMR (500 MHz,  $CDCl_3$ )  $\delta$  8.37 (s, 1H), 7.57 (d,  $J = 7.5$  Hz, 2H), 7.36 (dd,  $J = 8.5, 7.4$  Hz, 2H), 7.17 (ddt,  $J = 8.6, 7.3, 1.1$  Hz, 1H), 5.17 (dd,  $J = 10.7, 6.6$  Hz, 1H), 3.71 – 3.59 (m, 2H). HRMS (ESI):  $m/z$   $[M + H]^+$  calcd. for  $C_{10}H_{10}BrN_2O_2^+$ : 268.9920, found: 268.00216.

*N*-(3,5-bis(trifluoromethyl)phenyl)-3-bromo-4,5-dihydroisoxazole-5-carboxamide (**8**). (12.6 mg, 44.4%).  $^1H$  NMR (500 MHz,  $CDCl_3$ )  $\delta$  8.66 (s, 1H), 8.10 (d,  $J = 1.6$  Hz, 2H), 7.67 (s, 1H), 5.20 (dd,  $J = 11.5, 5.5$  Hz, 1H), 3.71 (dd,  $J = 18.0, 11.5$  Hz, 1H), 3.63 (dd,  $J = 18.0, 5.5$  Hz, 1H). HRMS (ESI):  $m/z$   $[M + H]^+$  calcd. for  $C_{12}H_8BrF_6N_2O_2^+$ : 404.9668, found: 404.96653.

3-bromo-*N*-(4-methoxyphenyl)-4,5-dihydroisoxazole-5-carboxamide (**9**). (8.6 mg, 26.1%).  $^1H$  NMR (500 MHz,  $CDCl_3$ )  $\delta$  8.29 (s, 1H), 7.50 – 7.43 (m, 2H), 6.91 – 6.85 (m, 2H), 5.16 (dd,  $J = 10.6, 6.7$  Hz, 1H), 3.80 (s, 3H), 3.69 – 3.58 (m, 2H). HRMS (ESI):  $m/z$   $[M + H]^+$  calcd. for  $C_{11}H_{12}BrN_2O_3^+$ : 299.0026, found: 299.00615.

(3-bromo-4,5-dihydroisoxazol-5-yl)(6-methoxy-3,4-dihydroquinolin-1(2H)-yl)methanone (**10**). (27.6 mg, 63%).  $^1H$  NMR (500 MHz,  $CDCl_3$ )  $\delta$  7.28 (s, 1H), 6.81 – 6.70 (m, 2H), 5.37 – 5.26 (m, 1H), 4.17 (dt,  $J = 13.6, 7.1$  Hz, 1H), 3.89 – 3.74 (m, 4H), 3.49 (dt,  $J = 13.1, 6.6$  Hz, 1H), 3.16 (dd,  $J = 17.0, 10.8$  Hz, 1H), 2.73 (dt,  $J = 13.0, 6.2$  Hz, 1H), 2.62 (dt,  $J = 14.9, 7.0$  Hz, 1H), 2.06 (dt,  $J = 13.0, 6.5$  Hz, 1H), 1.87 (dt,  $J = 14.0, 7.2$  Hz, 1H). HRMS (ESI):  $m/z$   $[M + H]^+$  calcd. for  $C_{14}H_{16}BrN_2O_3^+$ : 339.0339, found: 339.04017.

3-bromo-*N*-(prop-2-yn-1-yl)-4,5-dihydroisoxazole-5-carboxamide (**24**).  $^1H$  NMR (500 MHz, DMSO)  $\delta$  5.07 (dd,  $J = 11.6, 6.9$  Hz, 1H), 3.88 (dd,  $J = 5.9, 2.4$  Hz, 2H), 3.62 (dd,  $J = 17.6, 11.5$  Hz, 1H), 3.37 (dd,  $J = 17.5, 6.9$  Hz, 1H), 3.12 (d,  $J = 5.0$  Hz, 1H). LC-MS (ESI):  $m/z$   $[M + H]^+$  calcd. for  $C_7H_8BrN_2O_2^+$ : 230.9764, found: 230.8.

3-bromo-*N*-(4-ethynylphenyl)-4,5-dihydroisoxazole-5-carboxamide (**25**).  $^1H$  NMR (500 MHz,  $CDCl_3$ )  $\delta$  8.41 (s, 1H), 7.57 – 7.53 (m, 2H), 7.50 – 7.45 (m, 2H), 5.16 (dd,  $J = 11.1, 6.1$  Hz, 1H), 3.71 – 3.57 (m, 2H), 3.07 (s, 1H). LC-MS (ESI):  $m/z$   $[M + H]^+$  calcd. for  $C_{12}H_{10}BrN_2O_2^+$ : 292.9920, found: 292.8.

(3-bromo-4,5-dihydroisoxazol-5-yl)(6-(hex-5-yn-1-yloxy)-3,4-dihydroquinolin-1(2H)-yl)methanone (**26**). (20.42 mg, 29.6%).  $^1H$  NMR (500 MHz,  $CDCl_3$ )  $\delta$  6.74 (d,  $J = 10.8$  Hz, 2H), 6.11 (s, 1H), 5.36 – 5.28 (m, 1H), 4.16 (dt,  $J = 13.5, 7.0$  Hz, 1H), 3.98 (t,  $J = 5.6$  Hz, 2H), 3.85 (dd,  $J = 17.0, 8.3$  Hz, 1H), 3.50 (dt,  $J = 12.9, 6.5$  Hz, 1H), 3.17 (dd,  $J = 16.9, 10.8$  Hz, 1H), 2.85 (t,  $J = 7.1$  Hz, 2H), 2.76 – 2.69 (m, 1H), 2.66 – 2.58 (m, 1H), 2.06 (dd,  $J = 8.5, 5.3$  Hz, 1H), 1.92 – 1.84 (m, 4H), 1.26 (s, 2H). HRMS (ESI):  $m/z$   $[M + H]^+$  calcd. for  $C_{19}H_{22}BrN_2O_3^+$ : 405.08083, found: 405.08430.

((*R*)-3-(4-amino-3-(4-phenoxyphenyl)-1*H*-pyrazolo[3,4-*d*]pyrimidin-1-yl)piperidin-1-yl)(3-bromo-4,5-dihydroisoxazol-5-yl)methanone (**27**).  $^1H$  NMR (500 MHz, DMSO)  $\delta$  8.39 – 8.36 (m, 1H), 7.66 (dtd,  $J = 6.9, 5.0, 2.6$  Hz, 2H), 7.47 – 7.42 (m, 2H), 7.23 – 7.11 (m, 5H), 5.66 (ddd,  $J = 11.3, 7.3, 2.2$  Hz, 1H), 5.56 (ddd,  $J = 25.6, 11.2, 7.2$  Hz, 1H), 4.93 – 4.82 (m, 1H), 4.78 (td,  $J = 10.3, 5.0$  Hz, 1H), 4.69 (td,  $J = 10.4, 5.1$  Hz, 1H), 4.45 (d,  $J = 12.6$  Hz, 1H), 4.12 (t,  $J = 12.4$  Hz, 1H), 3.93 (d,  $J = 13.2$  Hz, 1H), 3.76 – 3.62 (m, 1H), 3.59 – 3.46 (m, 1H), 3.32 – 3.21 (m, 1H), 2.32 – 2.09 (m, 2H), 2.03 – 1.82 (m, 1H), 1.79 – 1.50 (m, 1H). HRMS (ESI):  $m/z$   $[M + H]^+$  calcd. for  $C_{26}H_{25}BrN_7O_3^+$ : 562.1197, found: 562.13127.

((*R*)-3-(4-amino-3-(4-(3-ethynylphenoxy)phenyl)-1*H*-pyrazolo[3,4-*d*]pyrimidin-1-yl)piperidin-1-yl)(3-bromo-4,5-dihydroisoxazol-5-yl)methanone (**27-yne**).  $^1H$  NMR (500 MHz, DMSO)  $\delta$  8.34 (d,  $J = 6.1$  Hz, 1H), 7.68 (ddt,  $J = 7.2, 5.0, 2.1$  Hz, 2H), 7.47 – 7.42 (m, 1H), 7.29 (dd,  $J = 7.6, 1.3$  Hz, 1H), 7.23 – 7.17 (m, 4H), 5.68 – 5.51 (m, 1H), 4.87 (dd,  $J = 10.2, 5.5$  Hz, 1H), 4.81 – 4.74 (m, 1H), 4.73 – 4.66 (m, 1H), 4.48 – 4.41 (m, 1H), 4.26 (s, 1H), 4.12 (t,  $J = 11.3$  Hz, 1H), 3.96 – 3.80 (m, 1H), 3.76 – 3.62 (m, 2H), 3.52 (td,  $J = 17.2, 11.3$  Hz, 1H), 3.40 – 3.21 (m, 2H), 3.09 – 2.86 (m, 1H), 2.33 – 2.09 (m, 2H), 2.03 – 1.82 (m, 1H), 1.80 – 1.52 (m, 1H). HRMS (ESI):  $m/z$   $[M + H]^+$  calcd. for  $C_{28}H_{25}BrN_7O_3^+$ : 586.11968, found: 586.14067.

*N*-2-((3-acrylamidophenyl)amino)pyrimidin-5-yl)-2-methyl-5-(3-(trifluoromethyl)benzamido)benzamide (**28**). <sup>1</sup>H NMR (500 MHz, DMSO) δ 10.57 (s, 1H), 10.42 (s, 1H), 10.08 (s, 1H), 9.66 (s, 1H), 8.82 (s, 2H), 8.32 (d, *J* = 2.1 Hz, 1H), 8.29 (d, *J* = 7.9 Hz, 1H), 8.07 (t, *J* = 2.1 Hz, 1H), 7.99 (d, *J* = 7.6 Hz, 1H), 7.94 (d, *J* = 2.3 Hz, 1H), 7.87 – 7.78 (m, 2H), 7.41 – 7.31 (m, 3H), 7.20 (t, *J* = 8.1 Hz, 1H), 6.48 (dd, *J* = 16.9, 10.1 Hz, 1H), 6.25 (dd, *J* = 17.0, 2.0 Hz, 1H), 5.73 (dd, *J* = 10.1, 2.0 Hz, 1H), 2.39 (s, 3H). HRMS (ESI): *m/z* [*M* + *H*]<sup>+</sup> calcd. for C<sub>29</sub>H<sub>24</sub>F<sub>3</sub>N<sub>6</sub>O<sub>3</sub><sup>+</sup>: 561.18565, found: 561.18824.

3-bromo-*N*-(3-((5-(2-methyl-5-(3-(trifluoromethyl)benzamido)benzamido)pyrimidin-2-yl)amino)phenyl)-4,5-dihydroisoxazole-5-carboxamide (**29**). <sup>1</sup>H NMR (500 MHz, DMSO) δ 10.57 (s, 1H), 10.42 (s, 1H), 10.29 (s, 1H), 9.68 (s, 1H), 8.82 (s, 2H), 8.33 (s, 1H), 8.29 (d, *J* = 7.9 Hz, 1H), 8.08 (t, *J* = 2.1 Hz, 1H), 7.99 (d, *J* = 7.8 Hz, 1H), 7.93 (d, *J* = 2.3 Hz, 1H), 7.85 (dd, *J* = 8.3, 2.3 Hz, 1H), 7.81 (t, *J* = 7.8 Hz, 1H), 7.42 (dt, *J* = 8.2, 1.6 Hz, 1H), 7.36 – 7.28 (m, 2H), 7.21 (t, *J* = 8.1 Hz, 1H), 5.25 (dd, *J* = 11.1, 7.3 Hz, 1H), 3.65 (dd, *J* = 17.5, 11.1 Hz, 2H), 3.55 (dd, *J* = 17.5, 7.3 Hz, 2H), 2.39 (s, 3H). HRMS (ESI): *m/z* [*M* + *H*]<sup>+</sup> calcd. for C<sub>30</sub>H<sub>24</sub>BrF<sub>3</sub>N<sub>7</sub>O<sub>4</sub><sup>+</sup>: 682.10198, found: 682.10298.

#### General procedure for synthesis of compounds **2-4** and **12-14**

(3-bromo-4,5-dihydroisoxazol-5-yl)methanamine. To a stirred solution of allylamine hydrochloride (230 mg, 2.45 mmol) in water was added dibromoformaldoxime (330 mg, 1.63 mmol). 20% aq. KHCO<sub>3</sub> (1 mL) was added dropwise and the solution was stirred for 10 min. 50% aq. KOH was added, and the resulting reaction mixture was filtered and extracted with dichloromethane (DCM, 3 x 10 mL). The combined organic layer was washed with brine, dried over anhydrous Na<sub>2</sub>SO<sub>4</sub>, filtered, and concentrated *in vacuo*. The crude product was purified by CombiFlash (DCM:MeOH, 0 to 10%) to give the title compound as a yellow oil (62 mg, 21%). <sup>1</sup>H NMR (500 MHz, CDCl<sub>3</sub>) δ 4.73 (m, *J* = 10.0, 7.9, 5.8, 3.8 Hz, 1H), 3.24 (dd, *J* = 17.1, 10.6 Hz, 1H), 3.08 (dd, *J* = 17.1, 8.0 Hz, 1H), 3.00 (dd, *J* = 13.6, 3.8 Hz, 1H), 2.85 (dd, *J* = 13.6, 5.8 Hz, 1H). LC-MS (ESI): *m/z* [*M* + *H*]<sup>+</sup> calcd. for C<sub>4</sub>H<sub>8</sub>BrN<sub>2</sub>O<sup>+</sup>: 178.98, found: 179.1.

A solution of carboxylic acid (0.06 mmol), (3-bromo-4,5-dihydroisoxazol-5-yl)methanamine (11 mg, 0.064 mmol), EDC (14 mg, 0.09 mmol), and DMAP (11 mg, 0.09 mmol) in DMF was stirred at room temperature overnight. DMF was evaporated, and the crude reaction mixture was purified by HPLC to give the title compound.

5-(((3-bromo-4,5-dihydroisoxazol-5-yl)methyl)carbamoyl)-2-(6-(dimethylamino)-3-(dimethyliminio)-3H-xanthen-9-yl)benzoate (**2**). (1.87 mg, 83%). LC-MS (ESI): *m/z* [*M* + *H*]<sup>+</sup> calcd. for C<sub>29</sub>H<sub>28</sub>BrN<sub>4</sub>O<sub>5</sub><sup>+</sup>: 591.1, found: 590.8.

5-((1-(3-bromo-4,5-dihydroisoxazol-5-yl)-3-oxo-6,9,12,15-tetraoxa-2-azaheptadecan-17-yl)carbamoyl)-2-(6-(dimethylamino)-3-(dimethyliminio)-3H-xanthen-9-yl)benzoate (**3**). (0.67 mg, 54%). LC-MS (ESI): *m/z* [*M* + *H*]<sup>+</sup> calcd. for C<sub>40</sub>H<sub>49</sub>BrN<sub>5</sub>O<sub>10</sub><sup>+</sup>: 838.3, found: 837.8.

*N*-((3-bromo-4,5-dihydroisoxazol-5-yl)methyl)pent-4-ynamide (**4**). White solid (4.25 mg, 54%). <sup>1</sup>H NMR (500 MHz, CDCl<sub>3</sub>) δ 5.95 (m, 1H), 4.86 – 4.77 (m, 1H), 3.68 – 3.52 (m, 2H), 3.27 (dd, *J* = 17.5, 10.7 Hz, 1H), 3.02 (dd, *J* = 17.5, 8.1 Hz, 1H), 2.54 (ddt, *J* = 10.2, 6.2, 2.8 Hz, 2H), 2.48 – 2.38 (m, 2H), 2.03 (t, *J* = 2.6 Hz, 1H). HRMS (ESI): *m/z* [*M* + *H*]<sup>+</sup> calcd. for C<sub>9</sub>H<sub>12</sub>BrN<sub>2</sub>O<sub>2</sub><sup>+</sup>: 259.0077, found: 259.00767.

*N*-((3-bromo-4,5-dihydroisoxazol-5-yl)methyl)-3,5-bis(trifluoromethyl)benzamide (**12**). (5 mg, 20.6%). <sup>1</sup>H NMR (500 MHz, CDCl<sub>3</sub>) δ 8.23 – 8.21 (m, 2H), 8.04 (d, *J* = 1.8 Hz, 1H), 6.64 (s, 1H), 4.94 (dtd, *J* = 10.3, 6.8, 3.1 Hz, 1H), 3.85 (dd, *J* = 14.4, 6.2, 3.1 Hz, 1H), 3.71 (dd, *J* = 14.4, 6.3 Hz, 1H), 3.41 (dd, *J* = 17.5, 10.6 Hz, 1H), 3.06 (dd, *J* = 17.6, 7.1 Hz, 1H). HRMS (ESI): *m/z* [*M* + *H*]<sup>+</sup> calcd. for C<sub>13</sub>H<sub>10</sub>BrF<sub>6</sub>N<sub>2</sub>O<sub>2</sub><sup>+</sup>: 418.9824, found: 418.98816.

*N*-((3-bromo-4,5-dihydroisoxazol-5-yl)methyl)-2-(pyridin-3-yl)-4,5-dihydrothiazole-4-carboxamide (**13**). <sup>1</sup>H NMR (500 MHz, CDCl<sub>3</sub>) δ 9.15 (t, *J* = 3.0 Hz, 1H), 8.87 – 8.77 (m, 1H), 8.53 – 8.41 (m, 1H), 7.72 (ddt, *J* = 13.8, 8.1, 5.4 Hz, 1H), 7.11 (d, *J* = 43.9 Hz, 2H), 5.32 – 5.22 (m, 1H), 4.99 – 4.74 (m, 2H), 3.89 – 3.50 (m, 5H), 3.43 – 3.26 (m, 2H), 3.07 (dddd, *J* = 28.4, 17.5, 7.6, 3.3 Hz, 1H), 2.94 (ddd, *J* = 17.6, 7.0, 3.2 Hz, 1H). HRMS (ESI): *m/z* [*M* + *H*]<sup>+</sup> calcd. for C<sub>13</sub>H<sub>14</sub>BrN<sub>4</sub>O<sub>2</sub>S<sup>+</sup>: 369.0015, found: 369.01351.

*N*-((3-bromo-4,5-dihydroisoxazol-5-yl)methyl)-1,3-dimethyl-1*H*-pyrazolo[3,4-*b*]pyridine-5-carboxamide (**14**). <sup>1</sup>H NMR (500 MHz, CDCl<sub>3</sub>) δ 8.85 (d, *J* = 2.1 Hz, 1H), 8.35 (d, *J* = 2.1 Hz, 1H), 6.51 – 6.45 (m, 1H), 4.88 (m, *J* = 10.6, 7.4, 5.8, 3.3 Hz, 1H), 4.03 (s, 3H), 3.76 (ddd, *J* = 14.5, 6.0, 3.3 Hz, 1H), 3.70 (dt, *J* = 14.4, 6.1 Hz, 1H), 3.31 (dd, *J* = 17.5, 10.7 Hz, 1H), 3.02 (dd, *J* = 17.5, 7.3 Hz, 1H), 2.52 (s, 3H). HRMS (ESI): *m/z* [M + H]<sup>+</sup> calcd. for C<sub>13</sub>H<sub>15</sub>BrN<sub>5</sub>O<sub>2</sub><sup>+</sup>: 352.0404, found: 352.0485.

#### General procedure for synthesis of compounds **5** and **15-19**

A solution of styrene (0.29 mmol), dibromoformaldoxime (101 mg, 0.52 mmol), and K<sub>2</sub>CO<sub>3</sub> (281 mg, 2.0 mmol) in EtOAc was stirred at room temperature overnight. The reaction solution was diluted with H<sub>2</sub>O and extracted with EtOAc. The crude product was purified by CombiFlash (Hx:EtOAc, 0 to 20%) to give the final product.

3-(3-bromo-4,5-dihydroisoxazol-5-yl)-*N*-(prop-2-yn-1-yl)benzamide (**5**). (9.3 mg, 13.8%). <sup>1</sup>H NMR (500 MHz, CDCl<sub>3</sub>) δ 7.75 (dt, *J* = 8.8, 1.9 Hz, 2H), 7.53 – 7.45 (m, 2H), 6.46 (t, *J* = 5.4 Hz, 1H), 5.73 (dd, *J* = 10.9, 8.8 Hz, 1H), 4.26 (dd, *J* = 5.3, 2.5 Hz, 2H), 3.66 (dd, *J* = 17.3, 11.0 Hz, 1H), 3.20 (dd, *J* = 17.3, 8.8 Hz, 1H), 2.30 (d, *J* = 2.4 Hz, 1H). HRMS (ESI): *m/z* [M + H]<sup>+</sup> calcd. for C<sub>13</sub>H<sub>12</sub>BrN<sub>2</sub>O<sub>2</sub><sup>+</sup>: 307.00767, found: 307.01105.

3-bromo-5-phenyl-4,5-dihydroisoxazole (**15**). (35.3 mg, 53.8%). <sup>1</sup>H NMR (500 MHz, CDCl<sub>3</sub>) δ 7.43 – 7.32 (m, 5H), 5.67 (dd, *J* = 10.9, 9.0 Hz, 1H), 3.62 (dd, *J* = 17.2, 10.9 Hz, 1H), 3.21 (dd, *J* = 17.2, 9.0 Hz, 1H). HRMS (ESI): *m/z* [M + H]<sup>+</sup> calcd. for C<sub>9</sub>H<sub>9</sub>BrNO<sup>+</sup>: 225.9862, found: 225.98654.

3-bromo-5-(3-nitrophenyl)-4,5-dihydroisoxazole (**16**). (6.2 mg, 17.6%). <sup>1</sup>H NMR (500 MHz, CDCl<sub>3</sub>) δ 8.25 – 8.19 (m, 2H), 7.74 – 7.68 (m, 1H), 7.64 – 7.57 (m, 1H), 5.78 (dd, *J* = 11.0, 8.4 Hz, 1H), 3.74 (dd, *J* = 17.3, 11.0 Hz, 1H), 3.21 (dd, *J* = 17.3, 8.4 Hz, 1H). HRMS (ESI): *m/z* [M + H]<sup>+</sup> calcd. for C<sub>9</sub>H<sub>8</sub>BrN<sub>2</sub>O<sub>3</sub><sup>+</sup>: 270.9713, found: 270.97153.

3-bromo-5-(4-nitrophenyl)-4,5-dihydroisoxazole (**17**). (18.6 mg, 52.8%). <sup>1</sup>H NMR (500 MHz, CDCl<sub>3</sub>) δ 8.29 – 8.22 (m, 2H), 7.56 – 7.49 (m, 2H), 5.78 (dd, *J* = 11.1, 8.2 Hz, 1H), 3.74 (dd, *J* = 17.2, 11.1 Hz, 1H), 3.17 (dd, *J* = 17.3, 8.2 Hz, 1H). HRMS (ESI): *m/z* [M + H]<sup>+</sup> calcd. for C<sub>9</sub>H<sub>8</sub>BrN<sub>2</sub>O<sub>3</sub><sup>+</sup>: 270.9713, found: 270.97120.

3-bromo-5-(4-methoxyphenyl)-4,5-dihydroisoxazole (**18**). (9.7 mg, 25.3%). <sup>1</sup>H NMR (500 MHz, CDCl<sub>3</sub>) δ 7.29 – 7.26 (m, 2H), 6.95 – 6.87 (m, 2H), 5.62 (dd, *J* = 10.8, 9.4 Hz, 1H), 3.82 (s, 3H), 3.56 (dd, *J* = 17.2, 10.8 Hz, 1H), 3.20 (dd, *J* = 17.3, 9.4 Hz, 1H). HRMS (ESI): *m/z* [M + H]<sup>+</sup> calcd. for C<sub>10</sub>H<sub>11</sub>BrNO<sub>2</sub><sup>+</sup>: 255.9968, found: 255.99728.

5-(3,5-bis(trifluoromethyl)phenyl)-3-bromo-4,5-dihydroisoxazole (**19**). (2.9 mg, 20%). <sup>1</sup>H NMR (500 MHz, CDCl<sub>3</sub>) δ 7.88 (s, 1H), 7.81 (s, 2H), 5.80 (dd, *J* = 11.1, 8.3 Hz, 1H), 3.76 (dd, *J* = 17.3, 11.1 Hz, 1H), 3.21 (dd, *J* = 17.3, 8.3 Hz, 1H). HRMS (ESI): *m/z* [M + H]<sup>+</sup> calcd. for C<sub>11</sub>H<sub>7</sub>BrF<sub>6</sub>NO<sup>+</sup>: 361.9610, found: 361.96117.

*N*-(2-(2-iodoacetamido)ethyl)-6-(5-methyl-2-oxoimidazolidin-4-yl)hexanamide (IA-DTB). IA-DTB was prepared following a reported procedure. <sup>1</sup>H NMR (500 MHz, DMSO) δ 8.26 (s, 1H), 7.78 (s, 1H), 6.29 (s, 1H), 6.11 (s, 1H), 3.62 – 3.56 (m, 3H), 3.50 – 3.44 (m, 1H), 3.08 (q, *J* = 2.7, 2.2 Hz, 4H), 2.04 (t, *J* = 7.5 Hz, 2H), 1.47 (q, *J* = 7.4 Hz, 2H), 1.37 – 1.28 (m, 3H), 1.28 – 1.16 (m, 3H), 0.95 (d, *J* = 6.5 Hz, 3H). LC-MS (ESI): *m/z* [M + H]<sup>+</sup> calcd. for C<sub>14</sub>H<sub>26</sub>I<sub>2</sub>N<sub>4</sub>O<sub>3</sub><sup>+</sup>: 425.1, found: 425.2.





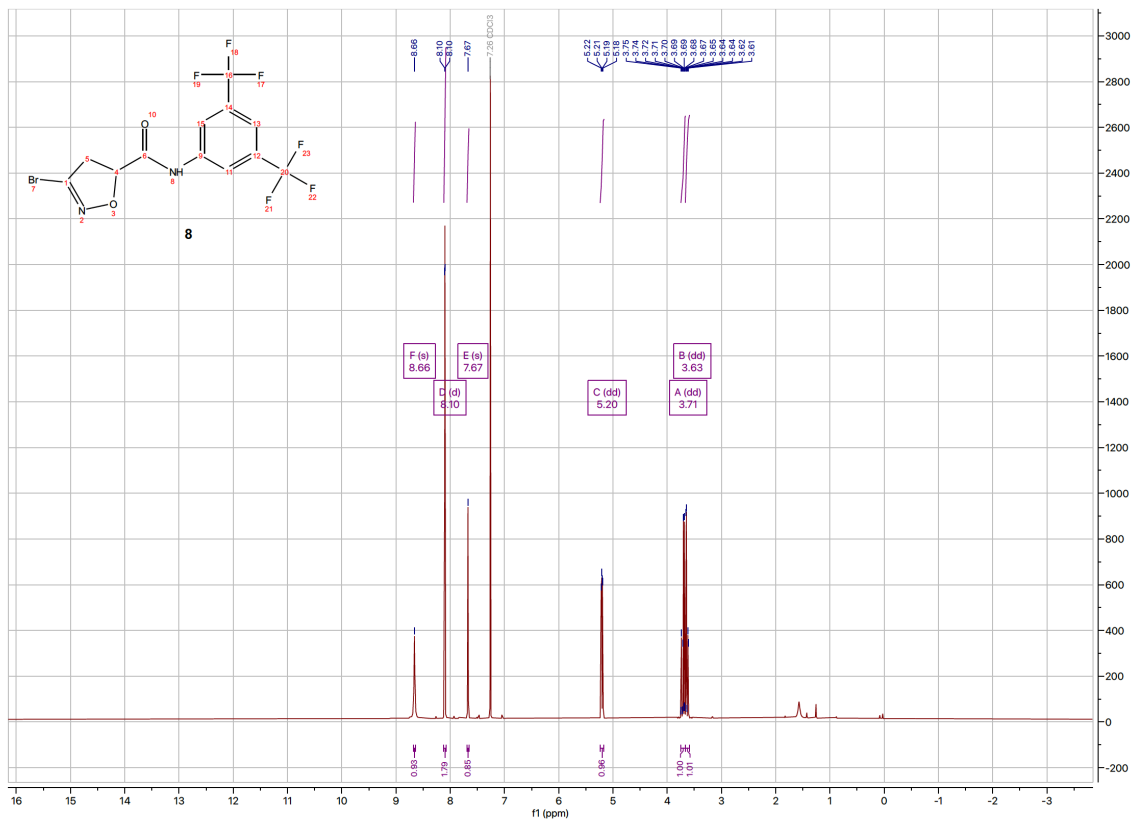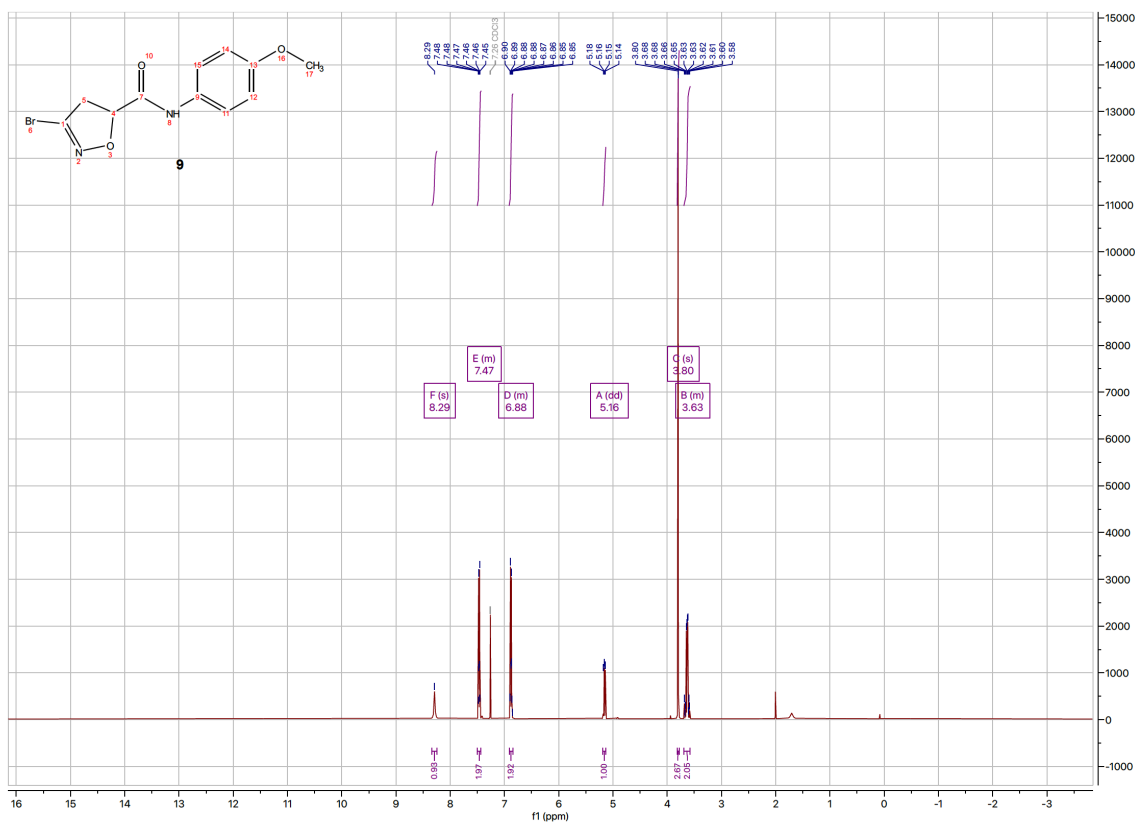



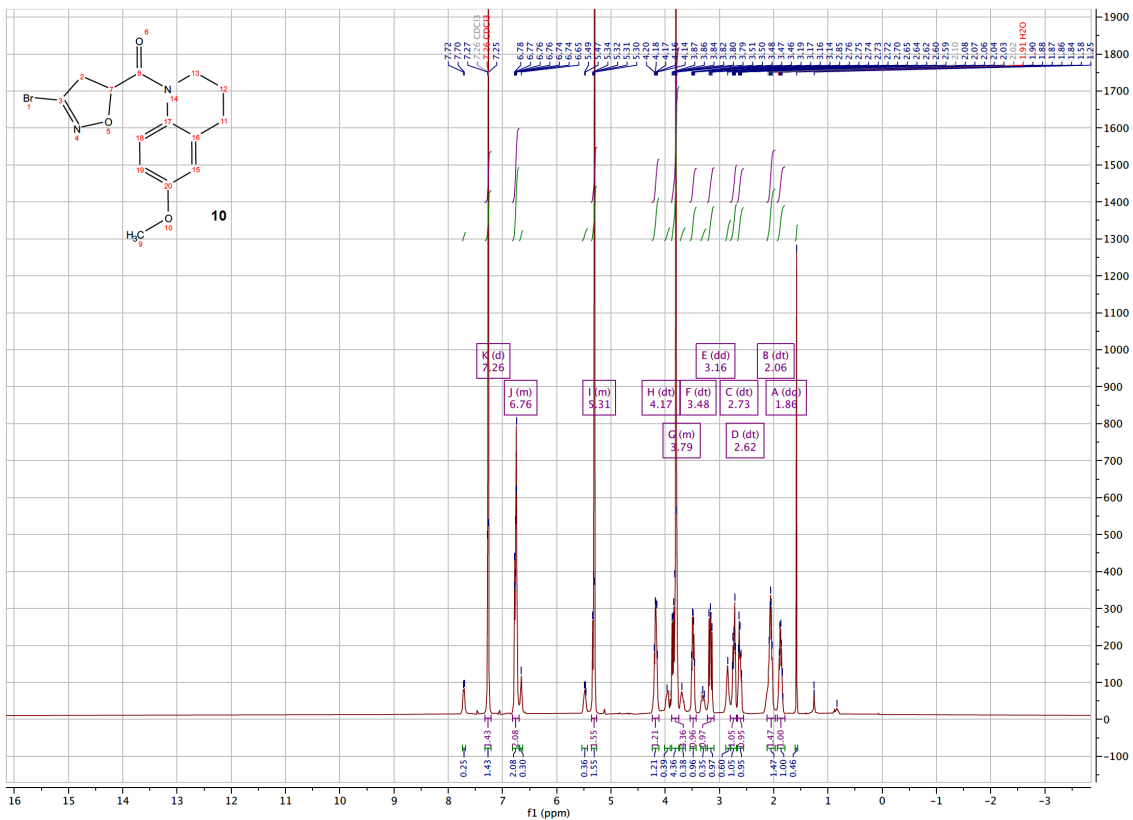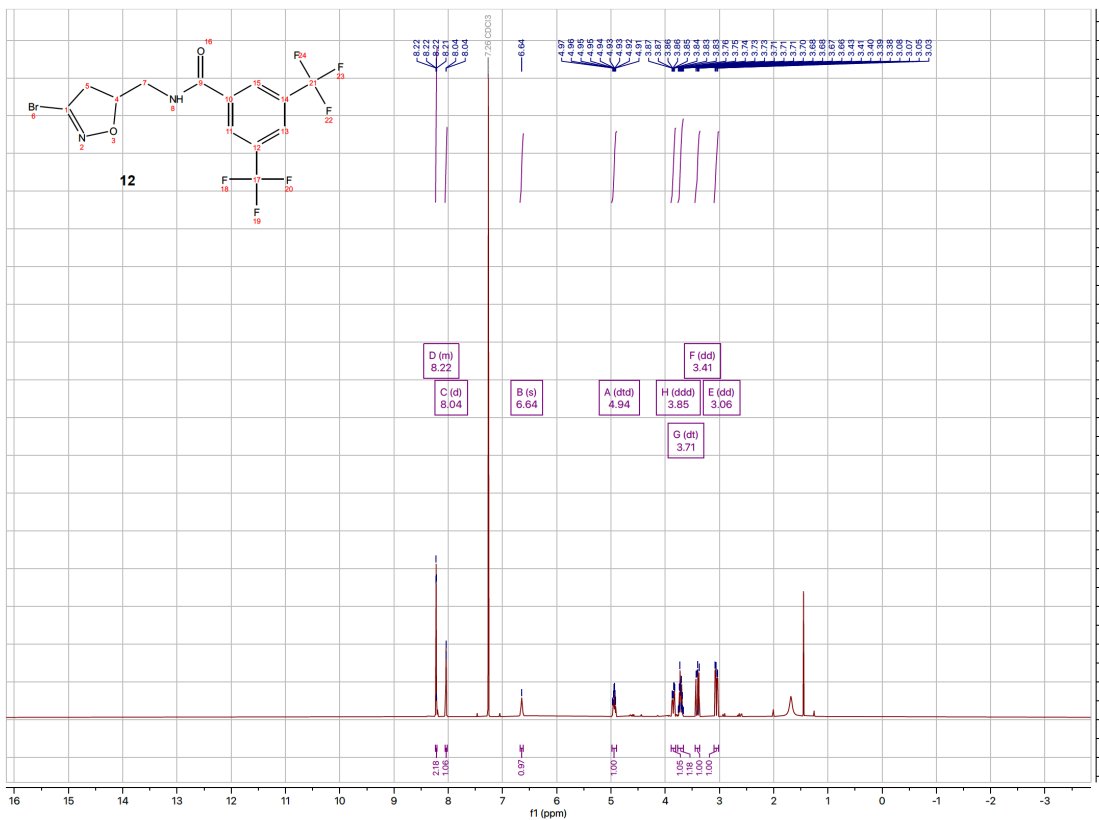

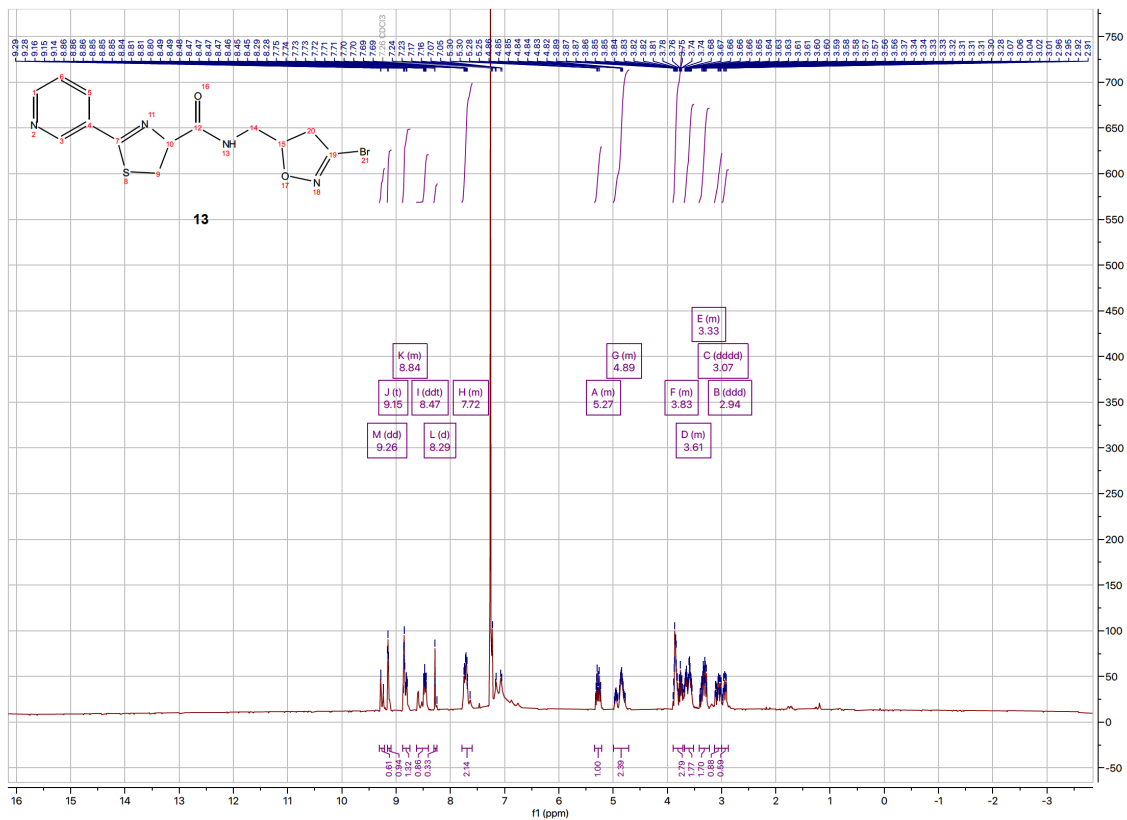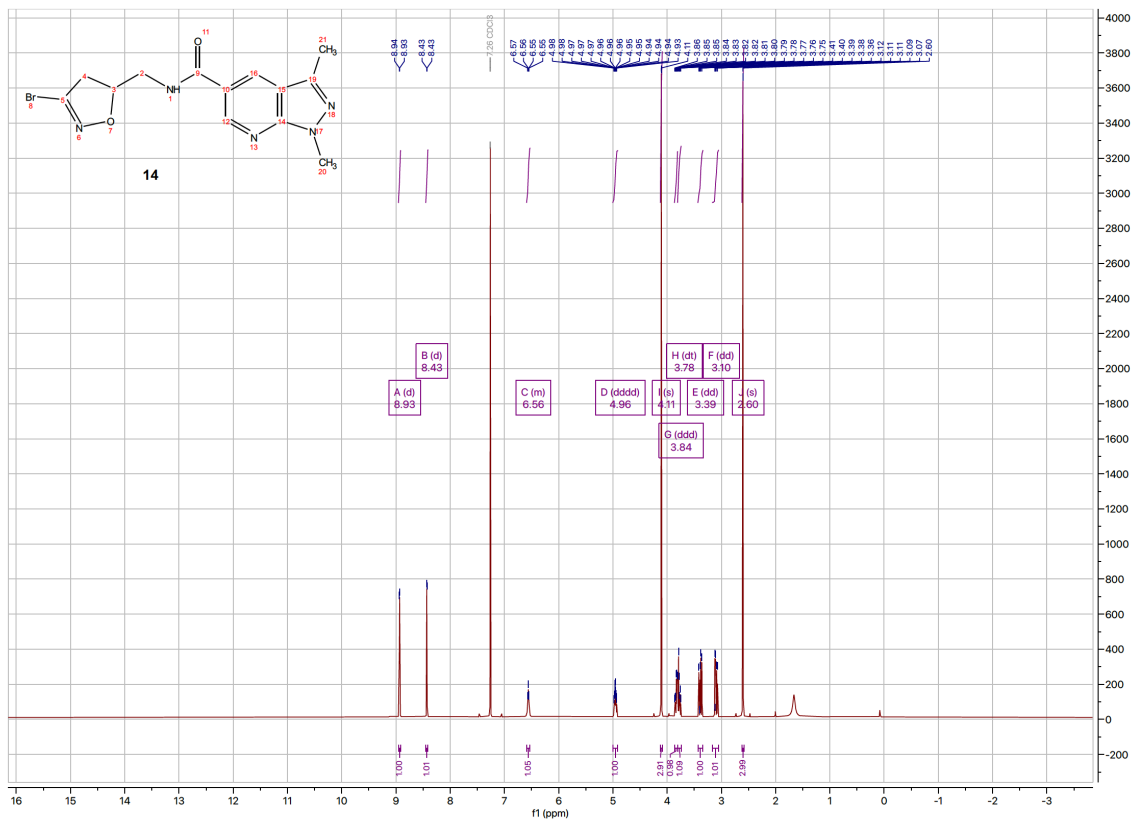



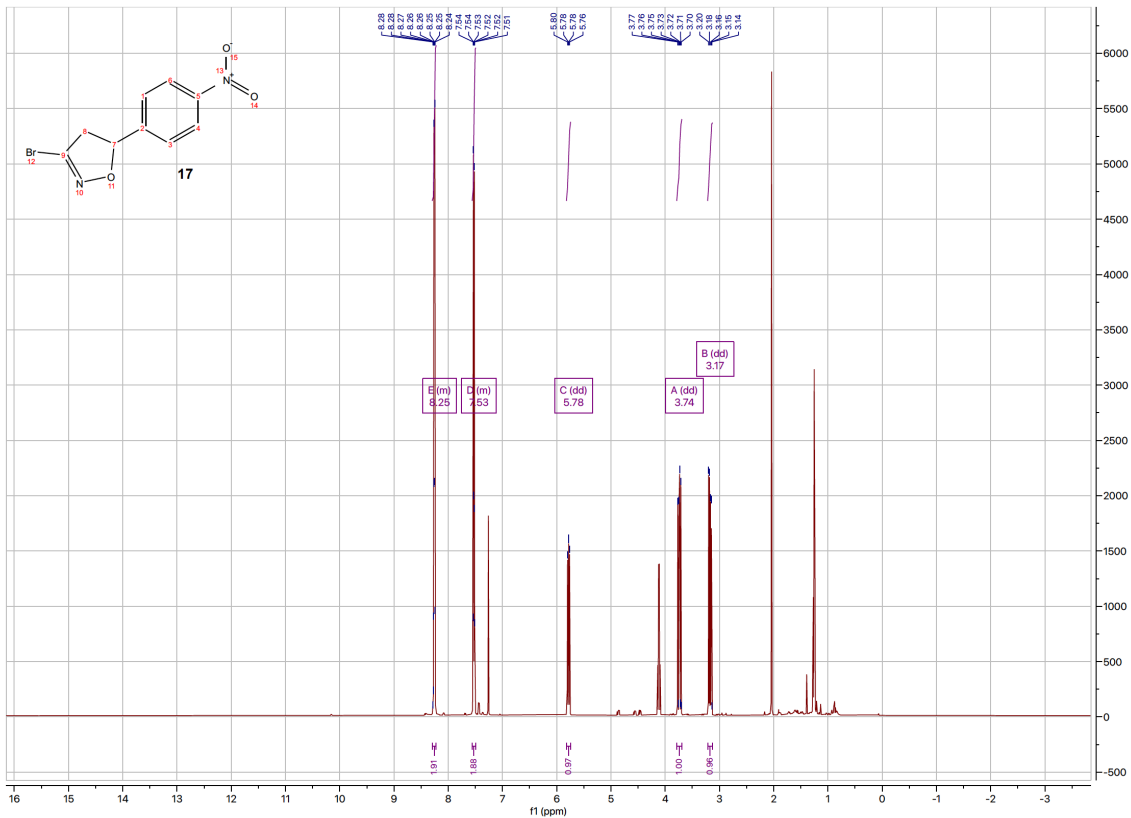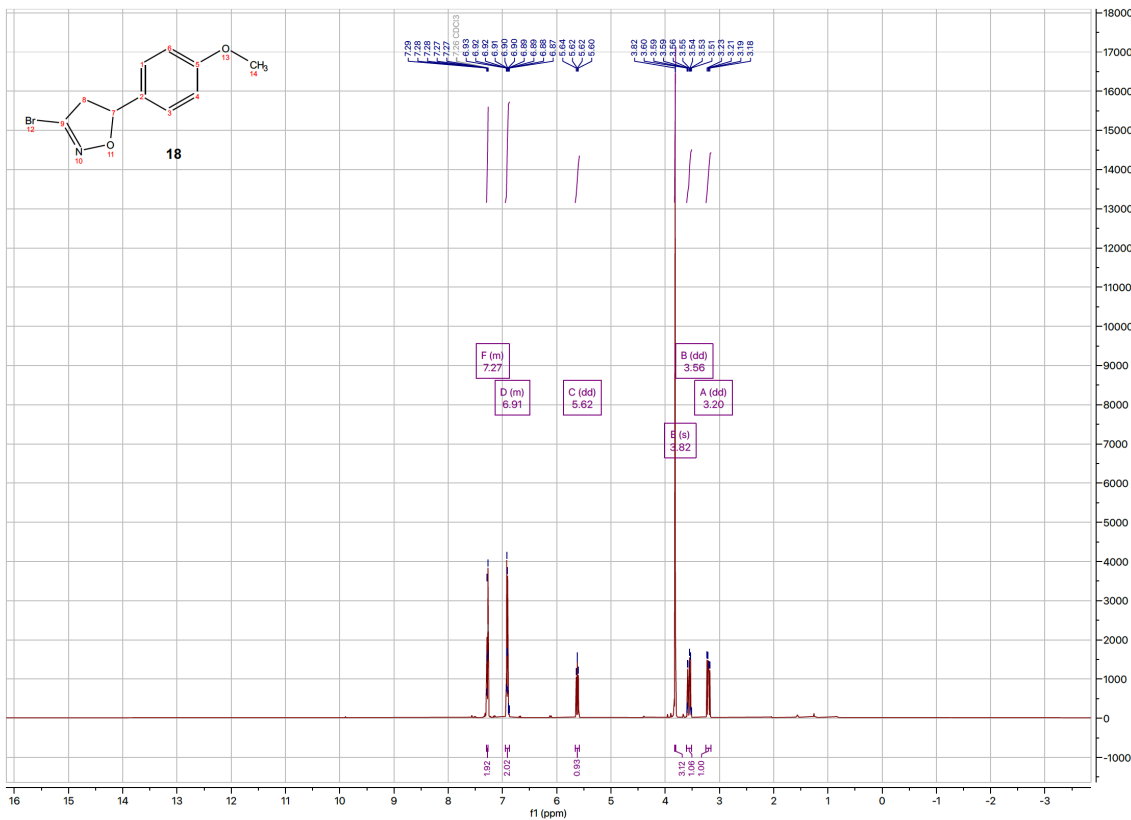

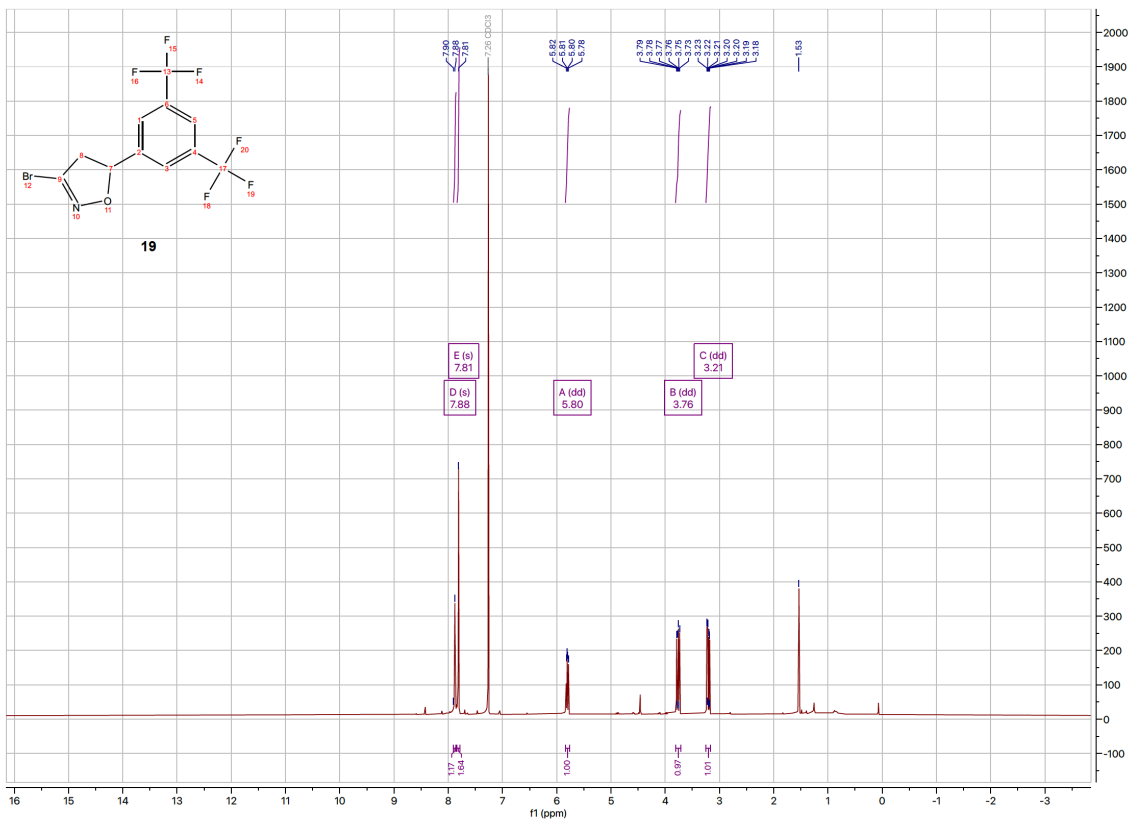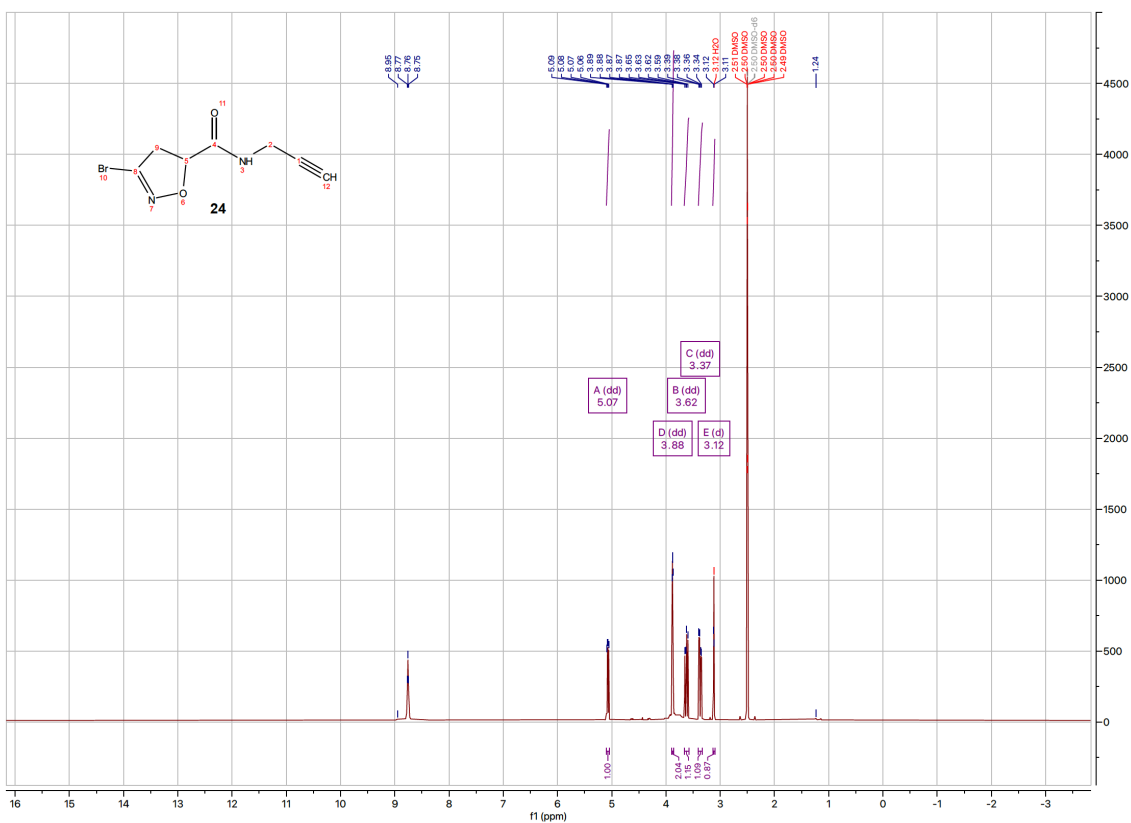



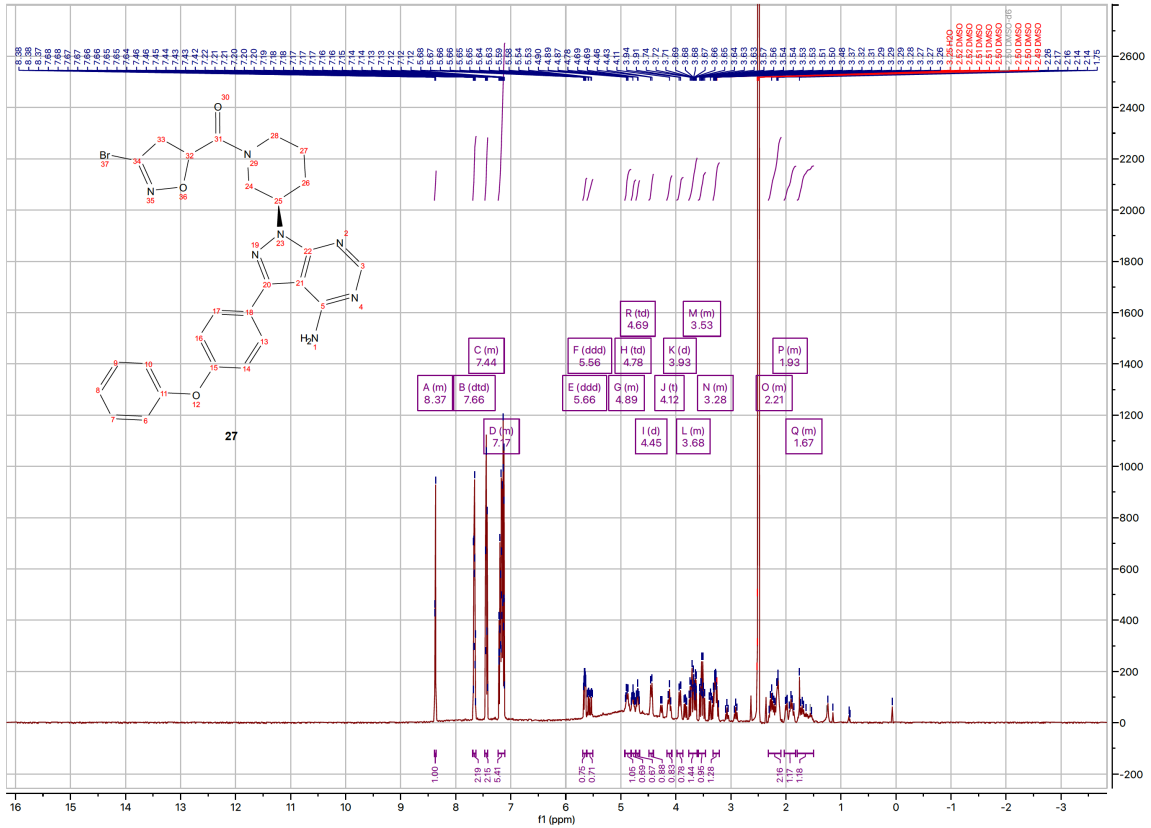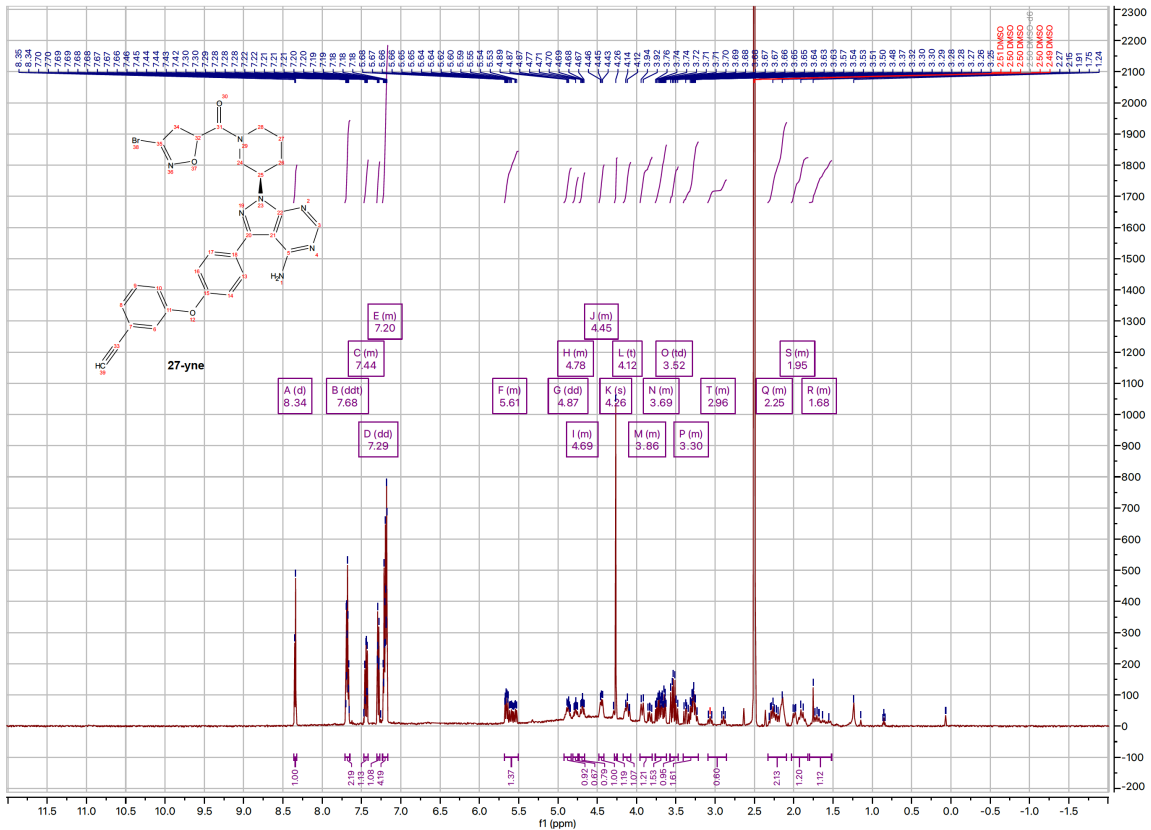





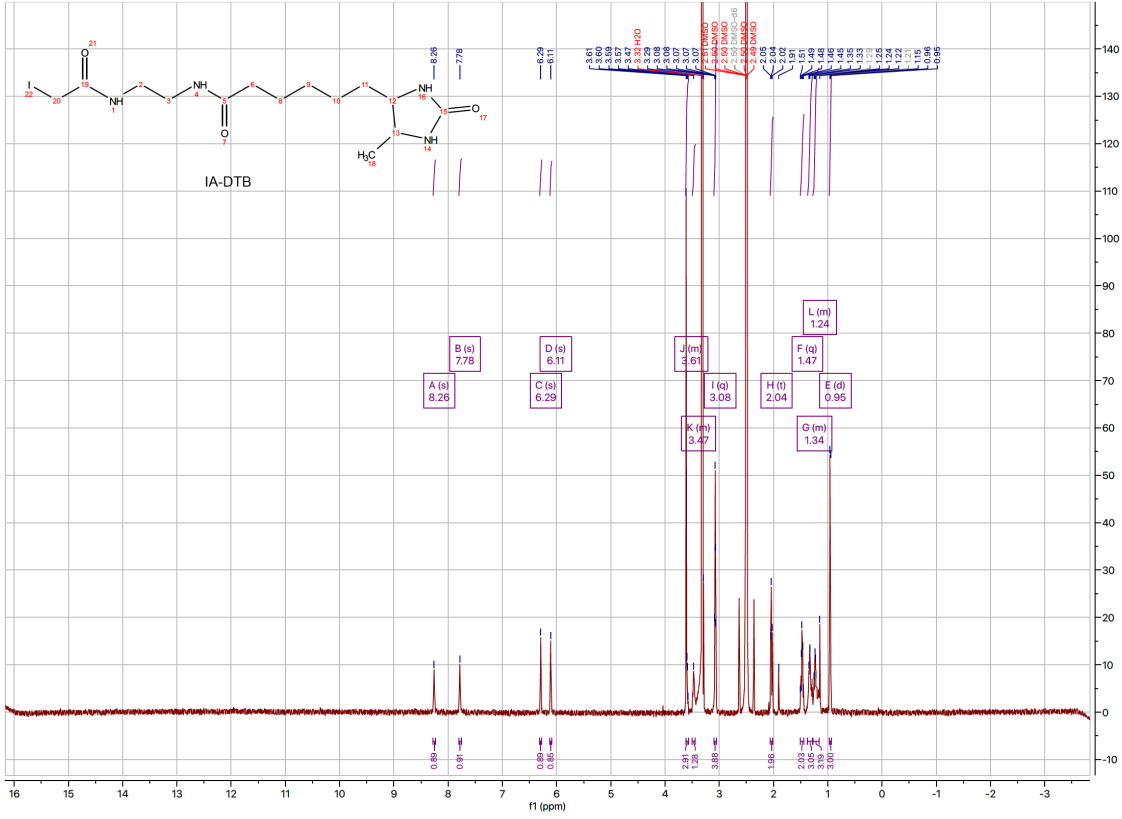

## References

1. Cowieson N. P. et al. MX1: a bending-magnet crystallography beamline serving both chemical and macromolecular crystallography communities at the Australian Synchrotron. *J. Synchrotron Rad.* **2015**, *22*, 187-190.
2. Aragão D. et al. MX2: a high-flux undulator microfocus beamline serving both the chemical and macromolecular crystallography communities at the Australian Synchrotron, *J. Synchrotron Rad.* **2018**, *25*, 885-891.
3. Kabsch W. Integration, scaling, space-group assignment and post-refinement. *Acta Cryst. D.* **2010**, *66*, 133-144.
4. Potterton L. et al. CCP4i2: the new graphical user interface to the CCP4 program suite. *Acta Cryst. D.* **2018**, *74*, 68-84.
5. Murshudov, G. N. et al. REFMAC5 for the refinement of macromolecular crystal structures. *Acta Cryst. D.* **2011**, *67*, 355-367.
6. Parker, L. J. et al. Visualisation of organoarsenic human glutathione transferase P1-1 complexes: metabolism of arsenic-based therapeutics. *Prot. Sci.* **2017**, *26*, 317-326.
7. Oakley, A. J. et al. The structures of human glutathione transferase P1-1 in complex with glutathione and various inhibitors at high resolution. *J. Mol. Biol.* **1997**, *274*, 84-100.
8. Emsley, P. et al. Features and Development of Coot. *Acta Cryst. D.* **2010**, *66*, 486-501.
9. Schmidt, M. W. et al. General Atomic and Molecular Electronic-Structure System. *J. Comput. Chem.* **1993**, *14* (11), 1347-1363.
10. Barca, G. M. J. et al. Recent developments in the general atomic and molecular electronic structure system. *J. Chem. Phys.* **2020**, *152* (15), 154102.
11. Hehre, W. J. et al. Self-Consistent Molecular-Orbital Methods. XII. Further Extensions of Gaussian-Type Basis Sets for Use in Molecular Orbital Studies of Organic Molecules. *J. Chem. Phys.* **1972**, *56* (5), 2257-2261.
12. Hariharan, P. C.; Pople, J. A. The Influence of Polarization Functions on Molecular Orbital Hydrogenation Energies. *Theor. Chim. Acta.* **1973**, *28* (3), 213-222.
13. Rassolov, V. A. et al. 6-31G\* basis set for third-row atoms. *J. Comput. Chem.* **2001**, *22* (9), 976-984.
14. Kohn, W.; Sham, L. J. Self-consistent equations including exchange and correlation effects. *Phys. Rev.* **1965**, *140* (4a), 1133-1138.
15. Peverati, R.; Truhlar, D. G. Improving the accuracy of hybrid meta-GGA density functionals by range separation. *J. Phys. Chem. Lett.* **2011**, *2* (21), 2810-2817.
16. Gonzalez, C.; Schlegel, H. B. An Improved Algorithm for Reaction-Path Following. *J. Chem. Phys.* **1989**, *90* (4), 2154-2161.
17. Spackman, M. A. Potential derived charges using a geodesic point selection scheme. *J. Comput. Chem.* **1996**, *17* (1), 1-18.
18. Bode, B. M.; Gordon, M. S. MacMolPit: a graphical user interface for GAMESS. *J. Mol. Graph. Model.* **1998**, *16* (3), 133-138.
